# Supplementary material for: Impact of sample multiplexing on detection of bacteria and antimicrobial resistance genes in pig microbiomes using long-read sequencing
Source: Front Microbiol. 2025 Jun 19;16:1597804. doi: 10.3389/fmicb.2025.1597804 (PMC12222346; doi:10.3389/fmicb.2025.1597804)
Supplement: Supplementary Table S5 — List of all identified bacterial species in the triplicate samples with four- and eight-plex of the pig microbiomes on both GridION and PromethION. Those are only for the triplicate samples to confirm the variations observed between sequenced samples. Each sheet represents one run and one multiplexing level (G: GridION - P, PromethION). [file Table_5.xlsx]

## Sheet: G1_four
species_name	G1_four_rep1	G1_four_rep2	G1_four_rep3
Lactobacillus amylovorus	0.539445	0.604474	0.743658
Limosilactobacillus reuteri	0.450521	0.429453	0.241933
Porphyromonadaceae bacterium	0.193809	0.332552	0.402982
Streptococcus alactolyticus	-0.0941653	0.0316284	0.0400115
Lactobacillus johnsonii	-0.201582	-0.0470625	-0.038798
Megasphaera elsdenii	-0.431993	-0.211523	-0.133256
Ligilactobacillus ruminis	-0.457749	-0.245513	-0.147517
Bifidobacterium pseudolongum	-0.612895	-0.444697	-0.374581
Klebsiella quasipneumoniae	-0.800847	-0.798268	-0.565173
Blautia obeum	0	0	-1.06905
Eubacterium pyruvativorans	-1.75306	-1.47984	-1.52717
Streptococcus vicugnae	-1.82929	-1.64246	-1.52796
Mediterraneibacter catenae	-1.94697	-1.78456	-1.75616
Phocea massiliensis	-2.06279	-1.87576	-1.82873
Phascolarctobacterium succinatutens	-2.02432	-1.92632	-1.87146
Bariatricus massiliensis	-2.3196	-2.12437	-1.99714
Lactobacillus gasseri	-2.58687	-2.18575	-2.20274
Oliverpabstia intestinalis	-2.48252	-2.36464	-2.2582
Selenomonas bovis	-2.52824	-2.62135	-2.36943
Mogibacterium kristiansenii	-2.48939	-2.53145	-2.38881
Bulleidia extructa	-2.5572	-2.24939	-2.43888
Bacteroides pyogenes	0	-2.47742	0
Bacteroides acidifaciens	0	0	-2.51739
Aureimonas psammosilenae	-2.71319	-2.5349	-2.55556
Faecalicoccus acidiformans	-2.73864	-2.51036	-2.59396
Clostridium indicum	-2.72078	-2.49395	-2.63313
Bifidobacterium boum	0	-2.72382	0
Bacteroides zhangwenhongi	0	-3.05767	-2.77004
Oribacterium asaccharolyticum	-3.12395	0	-2.92676
Oscillibacter ruminantium	-3.28753	0	-3.04076
Pseudoruminococcus massiliensis	-3.35125	-2.9979	0
Pseudoflavonifractor phocaeensis	0	-3.24262	-3.14317
Dorea longicatena	0	-3.22519	-3.16857
Christensenella intestinihominis	0	-3.41988	-3.11978
Agathobaculum desmolans	-3.34802	-3.21163	0
Prevotella oralis	-3.46104	0	-3.12968
Anaerobium acetethylicum	-3.43163	-3.21983	0
Hornefia butyriciproducens	-3.45582	0	-3.32858
Fusicatenibacter saccharivorans	0	-3.67138	-3.2242
Velocimicrobium porci	0	-3.7049	-3.22242
Lactobacillus porci	0	-3.90431	-3.37218
Agathobaculum butyriciproducens	0	-3.6564	-3.42048
Roseburia faecis	0	-3.37703	-3.44498
Agathobacter ruminis	-3.85968	0	-3.47016
Mediterranea massiliensis	-3.34167	0	-3.48079
Selenomonas montiformis	-3.7594	0	-3.49605
Evtepia gabavorous	0	-4.13169	-3.49694
Eubacterium coprostanoligenes	-3.73296	0	-3.62124
Trichococcus flocculiformis	0	-3.77728	-3.62345
Bacteroides fluxus	0	-3.39072	-3.68968
Anaerobutyricum hallii	0	-3.40953	-3.69534
Marseilla massiliensis	0	-4.142	-3.69409
Sharpea porci	-3.23603	0	-3.99981
Clostridium aminobutyricum	0	-3.57025	-4.03862
Ruminococcus gauvreauii	0	-3.4127	-4.26133
Parasutterella excrementihominis	-3.79281	0	-4.03673
[Ruminococcus] lactaris	-4.14568	-3.70087	0
Bacteroides eggerthii	-4.35881	0	-3.6092
Lentilactobacillus farraginis	-2.62453	-2.66518	-2.68374
Megasphaera hexanoica	-3.96087	0	-4.01796
Butyricicoccus porcorum	-4.22694	0	-3.75973
Gallibacter intestinalis	-4.08305	0	-3.92886
Frisingicoccus caecimuris	0	-3.86748	-4.23163
Clostridium vitabionis	-2.7987	-2.54579	-2.75899
Anaerobutyricum soehngenii	-2.98043	-2.61602	-2.68334
Streptococcus equinus	-2.7997	-2.74506	-2.75828
Terrisporobacter petrolearius	-4.27583	-4.11011	0
Prevotella mizrahii	-2.94497	-2.7377	-2.71877
Puniceibacterium confluentis	0	-4.21865	-4.18585
Limosilactobacillus panis	0	-4.19472	-4.25562
Collinsella bouchesdurhonensis	0	-4.24623	-4.26162
Terrisporobacter mayombei	0	-4.60906	-3.90306
Blautia glucerasea	0	-4.36952	-4.1838
Desulfovibrio piger	-4.523	0	-4.1358
Anaerostipes faecalis	0	-4.30173	-4.36753
Lactobacillus xujianguonis	-3.10243	-2.83648	-2.74795
Gemmiger formicilis	-3.26509	-3.04847	-2.61802
Sporobacter termitidis	-3.04243	-3.00255	-2.89476
Clostridium celatum	-2.86376	-3.0989	-3.09067
Clostridium cuniculi	-3.24791	-2.97433	-2.83138
Ruminococcus flavefaciens	-3.13233	-3.11614	-2.95179
Sinanaerobacter chloroacetimidivorans	-3.38224	-3.10066	-2.79444
Prevotella pectinovora	-3.2041	-3.1247	-3.03079
Eisenbergiella porci	-3.43728	-2.51011	-3.59637
Blautia producta	-3.37043	-3.12852	-3.05975
Mediterraneibacter faecis	-3.31814	-3.12101	-3.14603
Limosilactobacillus fermentum	-3.24951	-3.21175	-3.16529
Faecalicatena faecalis	-2.74262	-3.48936	-3.40091
Prevotella stercorea	-3.88569	-2.58852	-3.17139
Lactobacillus gallinarum	-3.51925	-3.04836	-3.11244
Prevotella colorans	-3.74049	-3.04381	-3.00482
Hespellia stercorisuis	-3.4627	-3.26745	-3.06186
Ruminococcus bromii	-3.47131	-3.0496	-3.27546
Blautia wexlerae	-3.23946	-3.10462	-3.56141
Alteribacter natronophilus	-4.92435	-4.99741	0
Bacteroides mediterraneensis	-3.23384	-3.41166	-3.28752
Heminiphilus faecis	-3.61278	-3.14992	-3.29547
Roseburia porci	-3.42991	-3.34748	-3.32429
Streptococcus thermophilus	-3.53287	-3.38183	-3.25622
Holdemanella porci	-3.12178	-3.45771	-3.6049
Prevotella hominis	-3.70367	-3.39789	-3.11183
Catenibacterium mitsuokai	-3.29244	-3.5015	-3.58682
Blautia massiliensis	-3.52822	-3.64352	-3.2164
Blautia luti	-3.52747	-3.46475	-3.41642
Treponema porcinum	-3.93363	-3.97	-2.51615
Merdimonas faecis	-3.77822	-3.47663	-3.45696
Ellagibacter isourolithinifaciens	-3.52583	-3.51067	-3.72553
Anaerobacterium chartisolvens	-3.78948	-3.66778	-3.3591
Metaprevotella massiliensis	-3.87455	-3.57873	-3.36977
Angelakisella massiliensis	-3.80766	-3.52248	-3.65137
Treponema bryantii	-3.85847	-3.36713	-3.78063
Robinsoniella peoriensis	-4.09881	-3.45721	-3.45277
Floccifex porci	-3.91947	-3.85298	-3.28308
Anaerovibrio slackiae	-3.38015	-4.04289	-3.80775
Acetivibrio ethanolgignens	-3.80243	-3.76739	-3.74429
Fibrobacter intestinalis	-4.02262	-3.73287	-3.56814
Fournierella massiliensis	-3.81413	-3.89011	-3.62944
Prevotella rara	-3.97132	-3.70948	-3.74733
Waltera intestinalis	-4.17934	-3.71805	-3.83337
Eubacterium ruminantium	-4.59	-3.78751	-3.65655
Solobacterium moorei	-4.09372	-3.77536	-4.16857
[Ruminococcus] torques	-3.99374	-4.22972	-3.94216
Paraprevotella clara	-4.14104	-3.9731	-4.1603
Roseburia inulinivorans	-4.04794	-4.27327	-3.97841
Alcanivorax profundi	-4.62176	-3.86785	-3.94634
Ruminococcus callidus	-4.58748	-4.23981	-3.70072
Baileyella intestinalis	-3.99502	-4.36623	-4.23667
Butyricicoccus faecihominis	-4.49316	-4.22848	-4.18105
Clostridium fessum	-4.33573	-4.3688	-4.20865
Schinkia azotoformans	-4.47453	-4.00953	-4.54767
Neobacillus bataviensis	-4.14542	-4.57533	-4.33265
Elizabethkingia argenteiflava	-4.71771	-4.17735	-4.35845
Clostridium minihomine	0	-3.03124	0
Catenibacillus scindens	0	-3.08215	0
Holdemania massiliensis	0	-3.10235	0
Clostridium jeddahense	-3.1477	0	0
Hydrogenoanaerobacterium saccharovorans	0	0	-3.19675
Caproiciproducens galactitolivorans	0	0	-3.25761
Massiliimalia timonensis	0	0	-3.27241
Coprococcus phoceensis	-3.29371	0	0
Clostridium porci	0	0	-3.32935
Dorea phocaeensis	0	0	-3.36915
Negativibacillus massiliensis	0	0	-3.37526
Paramuribaculum intestinale	0	0	-3.38291
Terrisporobacter othiniensis	0	-3.4181	0
Prevotella salivae	0	0	-3.42422
Lactobacillus kitasatonis	-3.43093	0	0
Butyrivibrio crossotus	0	-3.47269	0
Blautia intestinalis	0	-3.47592	0
Limosilactobacillus alvi	0	-3.54513	0
Phocaeicola coprocola	-3.5455	0	0
Holdemanella biformis	-3.55577	0	0
Bifidobacterium apri	-3.61423	0	0
Hydrogeniiclostidium mannosilyticum	0	-3.61986	0
Butyricimonas synergistica	-3.66925	0	0
Inconstantimicrobium porci	-3.67012	0	0
Desulfohalotomaculum alkaliphilum	0	-3.68645	0
Parabacteroides chinchillae	0	0	-3.7263
Faecalibacterium longum	0	0	-3.74505
Phocaeicola massiliensis	-3.78687	0	0
Ructibacterium gallinarum	0	0	-3.82905
Selenomonas ruminantium	0	-3.8518	0
Prevotella illustrans	0	0	-3.85678
Bacteroides togonis	0	-3.85851	0
Blautia schinkii	0	-3.87006	0
Lachnospira pectinoschiza	0	-3.87402	0
Bifidobacterium reuteri	0	0	-3.89694
Mitsuokella jalaludinii	-3.89954	0	0
Faecalibacillus faecis	-3.90457	0	0
Clostridium paraputrificum	0	0	-3.92197
Levilactobacillus namurensis	0	-3.92963	0
Eisenbergiella massiliensis	0	0	-3.97283
Absicoccus porci	0	0	-3.97342
Leuconostoc fallax	-3.97498	0	0
Alloprevotella rava	0	-3.99089	0
Bullifex porci	0	0	-4.00631
Prevotellamassilia timonensis	-4.04753	0	0
Hungatella hathewayi	0	-4.14674	0
Desulfosporosinus hippei	0	-4.14841	0
Hallerella porci	0	0	-4.19834
Romboutsia timonensis	0	0	-4.19884
Blautia faecis	0	-4.23128	0
Anaerotignum neopropionicum	0	0	-4.24443
Mailhella massiliensis	0	0	-4.25591
Ligilactobacillus equi	0	-4.32515	0
Nonomuraea glycinis	0	-4.33497	0
Lacticaseibacillus manihotivorans	0	0	-4.38934
Pontibacillus litoralis	0	0	-4.44744
Prevotella conceptionensis	0	-4.45126	0
Streptomyces caelestis	-4.4773	0	0
Prevotella lascolaii	0	-4.65631	0
Colwellia ponticola	0	-4.67588	0
Bacillus cabrialesii	0	-4.67938	0
Treponema zioleckii	0	0	-4.71253
Alistipes ihumii	0	0	-4.71415
Alishewanella longhuensis	0	0	-4.72823
Flavobacterium orientale	0	0	-4.74104
Myxococcus llanfairpwllgwyngyllgogerychwyrndrobwllllantysiliogogogochensis	0	0	-4.76878
Paenibacillus azotifigens	0	-4.91762	0
Eubacterium ramulus	0	0	-4.93302
Drancourtella massiliensis	0	0	-5.04818
Streptomyces galbus	0	0	-5.07539
Pediococcus parvulus	0	-2.66318	-2.58531
Bacteroides gallinarum	-2.78244	0	-2.85472
Enterococcus faecalis	0	-3.70244	-2.00285

## Sheet: G1_eight
species_name	G1_eight_rep1	G1_eight_rep2	G1_eight_rep3
Lactobacillus amylovorus	0.668952	1.00912	1.12147
Limosilactobacillus reuteri	0.393973	0.437995	0.891845
Porphyromonadaceae bacterium	0.300315	0.374203	0.737742
Megasphaera elsdenii	-0.144244	-0.065373	0.31898
Ligilactobacillus ruminis	-0.099314	-0.056305	0.283203
Streptococcus alactolyticus	-0.121558	-0.0778332	0.200458
Bifidobacterium pseudolongum	-0.435137	-0.345388	0.02824
Klebsiella quasipneumoniae	-0.694495	-0.573469	-0.311413
Lactobacillus johnsonii	0	-0.0301542	0
Streptococcus vicugnae	-1.48521	-1.41741	-1.09774
Lactobacillus kitasatonis	0	0	-1.21895
Eubacterium pyruvativorans	-1.50817	-1.5433	-1.21979
Mediterraneibacter catenae	-1.6873	-1.61159	-1.2316
Enterococcus faecalis	0	-2.07632	-1.43828
Phocea massiliensis	0	-2.88612	-1.46345
Phascolarctobacterium succinatutens	-1.97231	-1.90643	-1.55493
Bariatricus massiliensis	-2.03584	-2.01012	-1.62886
Lactobacillus gasseri	-2.32446	-2.14925	-1.75042
Clostridium indicum	-2.5296	-2.43127	-2.00028
Bacteroides acidifaciens	0	-2.37297	-2.0661
Clostridium vitabionis	-2.4398	-2.17632	-2.11786
Oliverpabstia intestinalis	-2.54966	-2.48977	-2.18185
Bifidobacterium boum	-2.77277	0	0
Selenomonas bovis	-3.47966	-2.51713	-2.19791
Streptococcus equinus	-2.97969	-2.70644	-2.23895
Bulleidia extructa	-2.55684	-2.47919	-2.24091
Limosilactobacillus fermentum	-2.884	-2.90076	-2.25542
Butyricicoccus porcorum	-3.51983	-2.6285	-2.2639
Faecalicoccus acidiformans	-2.62097	-2.58216	-2.26759
Gemmiger formicilis	-2.57591	-2.54375	-2.28047
Lactobacillus xujianguonis	-2.55763	-2.56949	-2.30474
Faecalicatena faecalis	0	-2.46449	-2.31776
Prevotella mizrahii	-2.69168	-2.5882	-2.32611
Sporobacter termitidis	-2.64547	-2.61088	-2.33485
Lentilactobacillus farraginis	-2.77931	-2.95096	-2.36021
Clostridium minihomine	0	0	-2.36156
Blautia wexlerae	-2.71184	-2.8555	-2.37123
Oscillibacter ruminantium	-2.88116	-2.88355	-2.38702
Aureimonas psammosilenae	-2.85573	-2.77046	-2.44467
Clostridium porci	-2.98023	0	-2.45444
Oribacterium asaccharolyticum	-2.99169	-2.84147	-2.45646
Prevotella pectinovora	-3.30979	-3.06877	-2.49519
Bacteroides gallinarum	0	-2.94728	-2.51012
Eisenbergiella porci	-3.49674	-3.04396	-2.53949
Clostridium cuniculi	-2.84833	-2.86925	-2.55063
Ruminococcus flavefaciens	-3.02723	-2.76742	-2.55562
Sinanaerobacter chloroacetimidivorans	-3.27463	-2.97352	-2.56621
Holdemania massiliensis	-3.17548	-3.36785	-2.60463
Dorea longicatena	-2.97309	-3.14345	-2.60983
Blautia producta	-3.12259	-3.15851	-2.62297
Hespellia stercorisuis	-3.25825	-3.11666	-2.6401
Mediterraneibacter faecis	-3.20864	-3.25625	-2.64075
Roseburia faecis	0	-3.46177	-2.64854
Pseudoruminococcus massiliensis	0	0	-2.69866
Lactobacillus gallinarum	-3.37067	-2.95878	-2.76233
Bacteroides mediterraneensis	-3.40973	-3.16953	-2.79361
Angelakisella massiliensis	-3.28106	-3.19844	-2.80064
Acetivibrio ethanolgignens	-3.85145	-3.18583	-2.81993
Hydrogenoanaerobacterium saccharovorans	0	0	-2.82021
Blautia massiliensis	-3.66676	-3.24031	-2.85714
Roseburia porci	-3.3497	-3.04151	-2.86019
Limosilactobacillus alvi	0	0	-2.87723
Terrisporobacter othiniensis	-3.30489	-3.15142	-2.87866
Ruminococcus bromii	0	-2.88571	-2.87943
Blastopirellula cremea	-3.74353	0	-2.88804
Merdimonas faecis	-3.57625	-3.2088	-2.89899
Blautia luti	-3.09763	-3.43246	-2.90168
Caproiciproducens galactitolivorans	0	0	-2.91229
Prevotella stercorea	-2.67068	-2.32103	-2.92172
Clostridium celatum	-3.47529	-3.21887	-2.9338
Fusicatenibacter saccharivorans	-3.36888	-2.76175	-2.95088
Heminiphilus faecis	0	-3.20067	-2.96395
Waltera intestinalis	-3.52449	-3.41674	-2.99338
Lactobacillus porci	-3.16342	-2.92432	-3.00257
Anaerobacterium chartisolvens	-3.20924	-3.27439	-3.01218
Prevotella hominis	0	-3.65753	-3.08084
Mediterranea massiliensis	0	-3.99354	-3.08977
Frisingicoccus caecimuris	-3.60028	-3.58265	-3.12856
Bacteroides fluxus	-3.2782	-3.44167	-3.13967
Mogibacterium kristiansenii	-3.61047	-3.65145	-3.1528
Faecalicatena fissicatena	0	0	-3.15322
Leeuwenhoekiella nanhaiensis	0	0	-3.15639
Candidatus Soleaferrea massiliensis	0	0	-3.1639
Prevotella colorans	-3.64477	-3.5178	-3.16641
Selenomonas montiformis	-3.56218	-4.16194	-3.17664
Ruminococcus gauvreauii	-3.52716	-3.41913	-3.17673
Pseudoflavonifractor phocaeensis	-3.85434	-3.28876	-3.19712
Prevotella illustrans	0	-3.2916	-3.20633
Solobacterium moorei	-3.72338	-3.7634	-3.21935
Treponema bryantii	-3.43128	-4.13328	-3.22656
Anaerobutyricum soehngenii	-2.97103	-2.96312	-3.23338
Robinsoniella peoriensis	-3.60708	-3.38802	-3.24617
Eubacterium ruminantium	-3.71962	-3.65182	-3.24832
Mitsuokella jalaludinii	-3.82931	0	-3.29804
Senegalimassilia anaerobia	0	0	-3.30384
Bifidobacterium reuteri	-3.67893	0	-3.30469
Wolbachia endosymbiont of Mansonella ozzardi	0	0	-3.3109
Streptococcus thermophilus	-3.43967	-3.00674	-3.31181
Blautia intestinalis	-4.1273	-3.72728	-3.31453
Fibrobacter intestinalis	-3.94081	-3.67999	-3.32524
Butyricicoccus faecihominis	-3.89024	-3.94193	-3.32623
Clostridium fessum	-4.14944	0	-3.33132
Bacteroides eggerthii	-3.81929	-4.12148	-3.33252
Evtepia gabavorous	0	-3.44865	-3.33373
Murimonas intestini	0	0	-3.3697
Paraprevotella clara	0	-4.0926	-3.3786
Paramuribaculum intestinale	-3.39598	-3.34562	-3.39853
Agathobacter ruminis	-4.30403	0	-3.42249
Treponema berlinense	-4.10365	0	-3.42696
Inconstantimicrobium porci	0	0	-3.43085
Treponema porcinum	-3.63181	-3.8059	-3.43592
Desulfovibrio piger	-3.91199	-3.53761	-3.43782
Ructibacterium gallinarum	0	-3.20354	-3.46316
[Ruminococcus] torques	-4.08614	-3.64409	-3.48659
Trichococcus ilyis	0	0	-3.50265
Anaerovibrio slackiae	-3.91698	-3.82629	-3.52386
Clostridium akagii	0	0	-3.52429
Neobacillus bataviensis	-3.8849	-3.60601	-3.53989
Terrisporobacter mayombei	0	-4.04436	-3.5411
Schinkia azotoformans	-3.92264	-3.35971	-3.55653
Alistipes shahii	0	0	-3.57717
Faecalibacterium longum	-4.10883	-3.61152	-3.58357
Fournierella massiliensis	0	-3.50454	-3.58519
Holdemanella porci	-4.35011	-3.48833	-3.60496
Blautia schinkii	0	-3.81799	-3.61007
Eisenbergiella massiliensis	-4.02543	0	-3.61294
Megasphaera hexanoica	-4.09853	0	-3.62865
Catenibacterium mitsuokai	-4.50994	-3.80923	-3.66275
Faecalitalea cylindroides	0	0	-3.68639
Collinsella bouchesdurhonensis	0	-4.32108	-3.6913
Ellagibacter isourolithinifaciens	-3.80657	-3.51686	-3.69389
Caloranaerobacter azorensis	0	0	-3.71211
Bifidobacterium castoris	0	0	-3.71501
Prevotella buccalis	-4.17419	0	-3.74189
Bacteroides togonis	0	-3.95471	-3.74441
Lapidilactobacillus concavus	0	0	-3.74852
Bacteroides zhangwenhongi	0	-3.48122	-3.753
Blautia glucerasea	0	-4.40217	-3.75313
Nesterenkonia natronophila	0	0	-3.75379
Butyrivibrio fibrisolvens	0	-4.05528	-3.76344
Butyricimonas synergistica	0	0	-3.7854
Parasutterella excrementihominis	0	0	-3.79346
Hallerella porci	0	-4.16224	-3.80049
Blautia faecis	0	0	-3.80914
Elizabethkingia argenteiflava	-4.0536	-4.23295	-3.83848
Pseudoscardovia suis	-3.8705	-4.08851	-3.87085
Duncaniella muris	0	0	-3.89001
Nonomuraea glycinis	0	0	-3.89329
Williamwhitmania taraxaci	0	-3.9674	-3.90627
Gemmiger gallinarum	0	-4.03776	-3.93227
Lachnobacterium bovis	0	0	-3.94321
Hallella seregens	-4.29641	0	-3.96036
Alcanivorax profundi	-4.45538	-4.23096	-3.99877
Baileyella intestinalis	-3.92174	-4.28408	-4.01677
Streptococcus vaginalis	-3.67036	0	-4.08501
Treponema zioleckii	-4.05014	-3.98027	-4.23091
Alishewanella longhuensis	0	0	-4.25294
Coprococcus catus	0	-4.63131	-4.31683
Myxococcus llanfairpwllgwyngyllgogerychwyrndrobwllllantysiliogogogochensis	0	-4.64941	-4.37151
Massiliimalia massiliensis	-3.22553	0	0
Clostridium disporicum	0	-3.24527	0
Alloprevotella rava	0	-3.30695	0
Clostridium paraputrificum	-3.49594	0	0
Hydrogeniiclostidium mannosilyticum	-3.51317	0	0
Ruminiclostridium hungatei	-3.54436	0	0
Metaprevotella massiliensis	-3.58717	0	0
Pseudoflavonifractor gallinarum	0	-3.64436	0
Bittarella massiliensis	-1.92388	-1.82791	0
Granulicatella balaenopterae	0	-3.75755	0
Leuconostoc fallax	-3.8149	0	0
Collinsella provencensis	0	-3.86773	0
Gallibacter intestinalis	-3.92394	0	0
Holdemanella biformis	0	-3.99682	0
Lachnospira pectinoschiza	-4.0071	0	0
Prevotella rara	0	-4.02375	0
Lachnospira multipara	0	-4.0255	0
Clostridium saudiense	-4.07721	0	0
Anaerostipes faecalis	0	-4.11119	0
Victivallis lenta	-4.13406	0	0
Intestinimonas timonensis	0	-4.16044	0
Secundilactobacillus similis	0	-4.19311	0
Floccifex porci	-4.19799	0	0
Ruminococcus callidus	-4.19799	0	0
Eubacterium xylanophilum	0	-4.22634	0
Peptococcus niger	-4.23162	0	0
Pontibacillus litoralis	-4.36977	0	0
Labilibacter sediminis	-4.46362	0	0
Slackia isoflavoniconvertens	0	-4.54408	0
Bacillus cabrialesii	-4.58533	0	0
Clostridium senegalense	-4.61281	0	0
Sutterella seckii	0	-4.62081	0
Alteribacter natronophilus	0	-4.88376	0
Prevotella oralis	-3.03282	-3.08329	0
Dorea phocaeensis	-3.10699	-3.05764	0
Agathobaculum desmolans	-3.1218	-3.21914	0
Parabacteroides chinchillae	-3.43986	-3.50933	0
Clostridium aminobutyricum	-3.59607	-3.54044	0
Eubacterium coprostanoligenes	-3.72509	-3.52612	0
[Ruminococcus] lactaris	-3.65727	-3.62559	0
Desulfohalotomaculum alkaliphilum	-3.59952	-3.68693	0
Clostridium puniceum	-3.94088	-3.47803	0
Tyzzerella nexilis	-3.67417	-4.0506	0
Corynebacterium striatum	-4.11252	-3.66733	0
Roseburia inulinivorans	-4.17171	-3.71224	0
Trichococcus flocculiformis	-4.23489	-3.68653	0
Velocimicrobium porci	-3.70868	-4.35163	0
Bullifex porci	-4.10229	-4.17445	0

## Sheet: G2_four
species_name	G2_four_rep1	G2_four_rep2	G2_four_rep3
Lactobacillus amylovorus	0.403793	0.496308	0.359694
Megasphaera elsdenii	0.00441953	0.121058	0.0998288
Porphyromonadaceae bacterium	-0.119699	-0.0214035	-0.0593706
Limosilactobacillus reuteri	-0.191707	-0.155871	-0.0931348
Lactobacillus johnsonii	-0.257148	-0.163976	-0.237139
Prevotella copri	-0.428676	-0.304157	-0.316272
Streptococcus alactolyticus	-0.463768	-0.401325	-0.462521
Ligilactobacillus ruminis	-0.654549	-0.585758	-0.626795
Klebsiella quasipneumoniae	-0.966025	-0.870262	-0.855286
Blautia obeum	-1.27314	-1.59367	-1.35333
Prevotella hominis	-1.71038	-1.6261	-1.64695
Dorea formicigenerans	-1.82402	-1.72291	-1.86116
Eubacterium pyruvativorans	-1.74816	-1.7098	-1.72166
Phocea massiliensis	-1.98711	-1.80606	-1.85263
Streptococcus vicugnae	-2.21637	-1.98569	-1.98221
Dorea longicatena	-1.97392	-1.92189	-2.02622
Blautia massiliensis	-2.68521	-2.03704	-2.18646
Lactobacillus crispatus	-2.98502	-2.13056	0
Bacteroides pyogenes	-2.53445	-2.71082	0
Porphyromonas somerae	0	0	-2.31894
Bacteroides kribbi	-2.12202	-2.07549	-2.15539
Caproiciproducens galactitolivorans	-3.24523	-3.29031	0
Oliverpabstia intestinalis	-2.2048	-2.18733	-2.20113
Massiliimalia timonensis	-3.24791	-3.37075	0
Phascolarctobacterium succinatutens	-2.28192	-2.19657	-2.22261
Mediterraneibacter catenae	-2.35237	-2.19734	-2.22761
Aureimonas psammosilenae	-2.23424	-2.14919	-2.24127
Bacteroides acidifaciens	-2.5143	-2.46729	-2.44076
Butyricicoccus porcorum	-2.4876	-2.45652	-2.49651
Prevotella pectinovora	-2.66042	-2.45825	-2.50574
Faecalicatena faecalis	-2.67732	-2.72321	-2.60822
Catenibacillus scindens	-2.68125	-2.58964	0
Bariatricus massiliensis	0	-2.66032	0
Phocaeicola massiliensis	0	-2.7666	-2.62902
Bulleidia extructa	-2.58515	-2.48631	-2.65516
Blautia wexlerae	-2.63613	-2.91857	-2.68037
Clostridium porci	-2.80359	-2.8032	-2.69274
Anaerobutyricum soehngenii	-2.64403	-2.55636	-2.7206
Bacteroides gallinarum	-2.96781	-2.87729	-2.72746
Faecalicoccus acidiformans	-2.82633	-2.78921	-2.76223
Agathobaculum desmolans	-2.89091	-2.94368	-2.76434
Lactobacillus porci	-2.95015	-2.73831	-2.76816
Holdemanella porci	-2.7895	-2.79895	-2.77095
Clostridium indicum	-2.70813	-2.78856	-2.77783
Fusicatenibacter saccharivorans	-3.00405	-2.89481	-2.78814
Prevotella mizrahii	-2.68131	-2.68792	-2.79929
Oribacterium asaccharolyticum	-2.82885	-2.77287	-2.81436
Lactobacillus gasseri	-3.1062	-2.72112	-2.9145
Bifidobacterium boum	-2.84416	-2.55537	-2.93483
Bacteroides zhangwenhongi	-2.82659	-2.99682	-2.94195
Roseburia faecis	-2.9208	-2.55968	-2.97986
Eubacterium coprostanoligenes	-2.88492	-2.8348	-3.00263
Clostridium celatum	-2.92778	-2.66613	-3.24318
Lactobacillus pasteurii	-3.01447	-2.93651	0
Prevotella brunnea	0	-2.97644	0
Oscillibacter ruminantium	0	-2.88483	-3.07015
Helcococcus massiliensis	0	-3.06661	-3.07248
Blautia producta	0	-3.17834	-3.14732
Clostridium jeddahense	0	-3.43716	-3.36732
Holdemania massiliensis	-3.43562	0	-3.54634
Liquorilactobacillus vini	-3.72515	-3.30243	0
Alloprevotella rava	0	-3.3963	-3.7173
Prevotella illustrans	-3.49201	0	-3.67002
Anaerovorax odorimutans	0	-3.47166	-3.69405
Terrisporobacter glycolicus	0	-3.50723	-3.67883
Lachnospira multipara	-4.44047	-2.86515	0
Limosilactobacillus alvi	0	-3.80899	-3.5088
Mediterraneibacter glycyrrhizinilyticus	0	-3.89498	-3.52428
Lactiplantibacillus plantarum	-3.76708	-3.6758	0
Campylobacter jejuni	-3.86394	-3.59638	0
Treponema porcinum	-3.35679	-1.95287	-2.19439
Butyricicoccus faecihominis	-2.58404	-2.33392	-2.61785
Butyrivibrio crossotus	-3.49076	-4.05124	0
[Eubacterium] cellulosolvens	-3.44592	0	-4.25192
Absicoccus porci	-3.89881	-3.79961	0
Lactobacillus equicursoris	-3.94678	-3.78658	0
Ruminiclostridium hungatei	0	-3.79172	-3.99754
Pseudoflavonifractor phocaeensis	0	-3.4672	-4.41529
Prevotellamassilia timonensis	0	-3.8873	-4.01136
Eisenbergiella massiliensis	0	-3.86444	-4.05996
Butyrivibrio fibrisolvens	-4.15673	0	-3.79277
Williamwhitmania taraxaci	0	-3.7438	-4.21637
Ruoffia tabacinasalis	0	-3.32339	-4.67973
Fibrobacter intestinalis	-3.63759	-4.39172	0
Blautia intestinalis	-4.13004	-4.03015	0
Granulicatella balaenopterae	0	-4.14736	-4.02098
Clostridium saudiense	-3.83049	-4.34655	0
Tyzzerella nexilis	-4.26259	-3.91995	0
Blautia faecis	0	-4.13622	-4.25152
Clostridium fessum	-4.40258	-3.98933	0
Schinkia azotoformans	-4.03668	-4.40108	0
Floccifex porci	-4.00452	-4.44562	0
Mordavella massiliensis	-4.40026	0	-4.08673
Ligilactobacillus pobuzihii	0	-4.38635	-4.46673
Bilifractor porci	0	-4.48619	-4.41101
Prevotella stercorea	-3.04044	-2.95138	-2.93921
Nonomuraea glycinis	-4.50343	-4.54318	0
Anaerovibrio slackiae	-3.05838	-3.13688	-2.93879
Lactobacillus gigeriorum	-3.09844	-3.03557	-3.00755
Ruminococcus flavefaciens	-3.34627	-2.88165	-2.94692
Bacteroides mediterraneensis	-3.32226	-2.81986	-3.09404
Trichococcus flocculiformis	-4.61184	0	-4.62805
Prevotella oralis	-3.37058	-2.93689	-2.96672
Agathobaculum butyriciproducens	-2.8738	-3.17099	-3.25577
Mitsuokella jalaludinii	-3.43439	-2.97747	-2.89449
Hespellia stercorisuis	-3.18546	-2.9945	-3.1397
Prevotella colorans	-3.23131	-3.05296	-3.08702
Roseburia porci	-3.17139	-3.12226	-3.11742
Lactobacillus xujianguonis	-3.36405	-3.00072	-3.09265
Drancourtella massiliensis	0	-4.70211	-4.80134
Anaerostipes faecalis	-4.30174	-2.55859	-2.70089
Sporobacter termitidis	-3.52059	-2.9047	-3.14258
Streptococcus thermophilus	-3.45151	-3.02178	-3.11802
Ruminococcus bromii	-3.29983	-3.02158	-3.27074
Sinanaerobacter chloroacetimidivorans	-3.42033	-3.15177	-3.06844
Blautia luti	-3.14803	-3.25771	-3.27065
Bacteroides fluxus	-3.15563	-3.22693	-3.30564
Mediterranea massiliensis	-3.40602	-3.06494	-3.23663
Eggerthella sinensis	-3.85926	-2.98154	-2.933
Alishewanella longhuensis	-4.88291	-4.90393	0
Lactobacillus nasalidis	0	-5.07132	-4.72356
Merdimonas faecis	-3.35646	-3.02752	-3.4276
Terrisporobacter othiniensis	-3.25286	-3.28207	-3.3222
Metaprevotella massiliensis	-3.20906	-3.35416	-3.30567
Mogibacterium kristiansenii	-3.94613	-2.8059	-3.12292
Clostridium paraputrificum	-3.42599	-3.25368	-3.27536
Pseudoruminococcus massiliensis	-3.60912	-3.22207	-3.15523
Catenibacterium mitsuokai	-3.30329	-3.31018	-3.37705
Clostridium vitabionis	-3.45988	-3.29111	-3.35692
Clostridium cuniculi	-3.36591	-3.37838	-3.37862
Waltera intestinalis	-3.57222	-3.38012	-3.32587
Alteribacter natronophilus	-5.13191	0	-5.14797
Selenomonas bovis	-3.54572	-2.78118	-3.97787
Faecalibacterium longum	-3.84867	-3.28372	-3.24637
Prevotella salivae	-3.66053	-3.19252	-3.58948
Gemmiger formicilis	-3.43981	-3.54147	-3.47016
Ellagibacter isourolithinifaciens	-3.31035	-3.48048	-3.7975
Inconstantimicrobium porci	-3.48591	-3.61015	-3.55405
Frisingicoccus caecimuris	-3.47959	-3.48013	-3.70535
Acetivibrio ethanolgignens	-3.58309	-3.56178	-3.54275
Anaerobacterium chartisolvens	-3.70769	-3.54585	-3.43421
Gemmiger gallinarum	-3.63022	-3.45563	-3.71289
[Ruminococcus] torques	-3.6718	-3.76943	-3.40553
Lactobacillus gallinarum	-3.82278	-3.59629	-3.46662
Holdemanella biformis	-3.03935	-3.62634	-4.25588
Robinsoniella peoriensis	-3.79396	-3.3775	-3.77029
Mediterraneibacter faecis	-3.67293	-3.75387	-3.56658
Eisenbergiella porci	-3.80961	-3.78138	-3.47085
Anaerostipes hominis	-3.75869	-3.67629	-3.72076
Hallerella porci	-3.69215	-3.59819	-3.9266
Angelakisella massiliensis	-3.82408	-3.62447	-3.91335
Agathobacter ruminis	-3.85719	-4.03817	-3.48283
Velocimicrobium porci	-4.07851	-3.37146	-3.95944
Marseilla massiliensis	-3.47759	-3.69699	-4.27332
Blautia glucerasea	-4.08629	-4.00312	-3.37144
Roseburia inulinivorans	-4.36003	-3.53545	-3.56715
Ructibacterium gallinarum	-4.17957	-3.31044	-4.02121
Limosilactobacillus fermentum	-3.94994	-3.71346	-3.96722
Paraprevotella clara	-3.8049	-4.01617	-3.82958
Solobacterium moorei	-3.65901	-3.90126	-4.2391
Desulfohalotomaculum alkaliphilum	-3.91912	-3.95994	-3.93626
Collinsella bouchesdurhonensis	-4.10104	-3.77381	-3.97468
Terrisporobacter mayombei	-3.7541	-4.23295	-3.89725
Eubacterium xylanophilum	-4.01237	-4.0685	-3.87996
Alistipes shahii	-4.00615	-3.87956	-4.09806
Bullifex porci	-4.41227	-3.73058	-4.04945
Ruminococcus callidus	-3.8354	-3.96926	-4.39142
Blautia stercoris	-3.99329	-4.33129	-4.03058
Treponema bryantii	-4.21843	-4.00631	-4.1577
Alcanivorax profundi	-4.32279	-4.05514	-4.09486
Hallella seregens	-4.56848	-3.90931	-4.03522
Faecalibacillus faecis	-4.26007	-4.30734	-3.98628
Baileyella intestinalis	-4.13503	-4.30323	-4.15391
Lactobacillus kitasatonis	-4.90082	-3.74097	-4.00507
Prevotella buccalis	-4.27757	-4.29874	-4.25827
Elizabethkingia argenteiflava	-4.3424	-4.23846	-4.31592
Ligilactobacillus equi	-4.90357	-4.13952	-4.01284
Desulfovibrio piger	-4.53592	-4.47008	-4.31575
Nesterenkonia natronophila	-4.69243	-4.36262	-4.34863
Hydrogenoanaerobacterium saccharovorans	0	-3.00168	0
Streptococcus macedonicus	0	-3.00576	0
Blautia schinkii	0	0	-3.06301
Intestinimonas massiliensis	0	0	-3.22484
Hornefia butyriciproducens	-3.38186	0	0
Coprococcus phoceensis	0	0	-3.40368
Prevotella rara	0	-3.53099	0
Ruminococcus gauvreauii	0	0	-3.533
Clostridium uliginosum	0	-3.54994	0
Streptococcus hyointestinalis	0	0	-3.60094
Selenomonas montiformis	0	-3.60567	0
Christensenella intestinihominis	0	-3.60985	0
Corynebacterium alimapuense	0	-3.62258	0
Sharpea azabuensis	-3.62308	0	0
Slackia isoflavoniconvertens	0	0	-3.64018
Clostridium aminobutyricum	0	0	-3.6819
Pediococcus parvulus	0	-3.68906	0
Sharpea porci	-3.69187	0	0
Faecalicatena fissicatena	0	0	-3.72286
Limosilactobacillus fastidiosus	0	-3.74299	0
Fournierella massiliensis	0	0	-3.7544
Terrisporobacter petrolearius	-3.84359	0	0
Dietzia maris	-3.8494	0	0
Caldibacillus hisashii	0	0	-3.85413
Heminiphilus faecis	-3.86986	0	0
Senegalimassilia anaerobia	0	-3.87199	0
Miniphocaeibacter massiliensis	-3.87508	0	0
Thalassococcus profundi	0	-3.87739	0
Latilactobacillus curvatus	0	0	-3.90662
Phocaeicola coprocola	-3.92983	0	0
Acetanaerobacterium elongatum	0	0	-3.98034
Lapidilactobacillus concavus	0	0	-3.98394
Rubneribacter badeniensis	0	-3.99224	0
Ruegeria haliotis	-3.99352	0	0
Leuconostoc fallax	0	0	-4.02529
Anaerococcus tetradius	0	-4.07267	0
Bacteroides eggerthii	0	-4.08583	0
Anaerovibrio lipolyticus	-4.10651	0	0
Eubacterium ventriosum	-4.10739	0	0
Lacrimispora algidixylanolytica	0	0	-4.14411
Aequorivita echinoideorum	0	-4.15045	0
Treponema berlinense	0	-4.1555	0
Ruoffia halotolerans	0	0	-4.15944
Flavobacterium amnicola	0	0	-4.17172
Paracoccus aeridis	0	-4.20229	0
Butyricicoccus pullicaecorum	0	0	-4.20243
Allisonella histaminiformans	-4.21465	0	0
Xylanivirga thermophila	0	0	-4.22388
Intestinibacter bartlettii	0	0	-4.22554
Clostridium sardiniense	-4.23135	0	0
Prevotella falsenii	0	0	-4.25113
Acetitomaculum ruminis	0	-4.29112	0
Blautia caecimuris	0	0	-4.32282
Caenispirillum bisanense	-4.32587	0	0
Lacticaseibacillus hegangensis	-4.368	0	0
Limosilactobacillus urinaemulieris	0	-4.3861	0
Atopostipes suicloacalis	0	-4.39095	0
Peptoniphilus stercorisuis	0	-4.39716	0
Bifidobacterium reuteri	-4.39969	0	0
Geomesophilobacter sediminis	0	-4.4024	0
Eubacterium ramulus	0	0	-4.41558
Anaerobutyricum hallii	0	-4.42236	0
Lapidilactobacillus gannanensis	0	-4.46224	0
Clostridium sartagoforme	0	-4.46345	0
Chryseobacterium oncorhynchi	0	-4.47142	0
Streptococcus plurextorum	0	-4.47173	0
Acinetobacter baumannii	-4.47783	0	0
Limosilactobacillus portuensis	-4.47887	0	0
Gallibacter intestinalis	0	0	-4.50452
Alistipes ihumii	0	-4.50615	0
Natranaerovirga hydrolytica	0	-4.51154	0
Intestinimonas timonensis	0	-4.52743	0
Prevotella lascolaii	-4.63253	0	0
Streptomyces longisporoflavus	0	0	-4.66879
Puniceibacterium confluentis	0	-4.68258	0
Slackia equolifaciens	0	0	-4.81625
Prevotella conceptionensis	0	0	-4.83471
Flavobacterium orientale	-4.87508	0	0
Treponema zioleckii	0	-4.8859	0
Neobacillus bataviensis	0	-4.89318	0
Desulfobulbus alkaliphilus	-4.89627	0	0
Streptomyces galbus	0	-5.26884	0
Vibrio marinisediminis	0	0	-5.2855

## Sheet: G2_eight
species_name	G2_eight_rep1	G2_eight_rep2	G2_eight_rep3
Lactobacillus amylovorus	0.426601	0.298281	0.803922
Megasphaera elsdenii	0.156899	0.118244	0.488377
Porphyromonadaceae bacterium	-0.0561844	-0.101397	0.262312
Lactobacillus johnsonii	-0.266208	-0.333928	0
Prevotella copri	-0.304928	-0.349881	-0.00145976
Limosilactobacillus reuteri	-0.388704	-0.439997	-0.134671
Streptococcus alactolyticus	-0.582661	-0.656067	-0.359965
Ligilactobacillus ruminis	-0.818265	-0.883423	-0.543542
Klebsiella quasipneumoniae	-0.911149	-0.892929	-0.638614
Eubacterium pyruvativorans	-1.7195	-1.77413	-1.37227
Prevotella hominis	-1.70384	-1.74199	-1.42645
Phocea massiliensis	-1.82253	-1.80351	-1.50571
Dorea longicatena	-1.98384	-1.99344	-1.79443
Bacteroides kribbi	-2.10355	-2.2726	-1.84289
Enterococcus faecalis	0	-2.26382	-1.9016
Phascolarctobacterium succinatutens	-2.22764	-2.27241	-1.92172
Aureimonas psammosilenae	-2.35091	-2.45762	-1.95144
Oliverpabstia intestinalis	-2.23743	-2.30604	-1.98472
Prevotella brunnea	-2.84766	0	0
Lactobacillus kitasatonis	-3.64234	-4.12507	-2.00124
Mediterraneibacter catenae	-2.18012	-2.5485	-2.05175
Butyricicoccus porcorum	-2.4241	-2.54038	-2.083
Roseburia faecis	-2.52825	-2.79617	-2.11109
Butyricicoccus faecihominis	-2.68895	-2.6685	-2.11878
Bacteroides acidifaciens	0	-2.40873	-2.13078
Bariatricus massiliensis	0	-2.96067	0
Dorea formicigenerans	-1.88494	-2.05583	0
Oribacterium asaccharolyticum	-2.81153	-2.77981	0
Blautia wexlerae	-2.53925	-2.58739	-2.16874
Eisenbergiella porci	-3.78945	-2.93361	-2.20003
Faecalicoccus acidiformans	-2.69748	-2.60519	-2.2697
Clostridium celatum	-2.63933	-3.23576	-2.30898
Clostridium porci	-2.62291	-2.68005	-2.31364
Prevotella mizrahii	-2.72566	-2.64605	-2.32756
Lactobacillus pasteurii	0	-2.65585	-2.34111
Bulleidia extructa	-2.58437	-2.61449	-2.37912
Bifidobacterium boum	0	-2.75949	-2.38764
Faecalicatena faecalis	-2.59259	-3.70717	-2.39335
Lactobacillus porci	-2.62661	-2.63542	-2.43867
Bacteroides mediterraneensis	-2.81724	-2.76584	-2.45283
Prevotella pectinovora	-2.63889	-2.82641	-2.46964
Clostridium vitabionis	-2.98282	-2.62516	-2.51912
Lactobacillus gasseri	-2.8757	-2.88573	-2.52572
Blautia luti	-3.20147	-2.91755	-2.5925
Clostridium indicum	-3.00653	-2.83517	-2.62535
Pseudoruminococcus massiliensis	0	0	-2.64042
Prevotella oralis	-2.82704	-3.0741	0
Bacteroides gallinarum	-2.931	-3.04013	0
Prevotella stercorea	-2.485	-3.07081	-2.13217
Terrisporobacter othiniensis	-2.88533	-3.18859	-2.64754
Roseburia porci	-2.95913	-2.991	-2.65352
Ruminococcus flavefaciens	-3.1445	-3.00228	-2.67885
Sporobacter termitidis	-2.9459	-2.97943	-2.67902
Agathobaculum desmolans	-2.77618	-3.53171	-2.67929
Eggerthella sinensis	-3.17374	0	-2.67985
Alloprevotella rava	-3.26682	-3.23442	-2.68184
Bacteroides zhangwenhongi	-3.81635	0	-2.69063
Oribacterium sinus	0	0	-2.7086
Lactobacillus xujianguonis	-3.11236	-2.9895	-2.72094
Fusicatenibacter saccharivorans	-3.1077	-2.90508	-2.72458
Mediterranea massiliensis	-2.90756	-2.98852	-2.73554
Clostridium paraputrificum	-3.14169	-3.26083	-2.7501
Blautia producta	-2.97196	-3.06621	-2.75198
Oscillibacter ruminantium	-2.86293	-2.92321	-2.76012
Prevotella colorans	-3.38989	-3.50967	-2.76694
Anaerobutyricum soehngenii	-2.80339	-3.19245	-2.78082
Streptococcus thermophilus	-3.09334	-3.28021	-2.78236
Merdimonas faecis	-3.15695	-2.98864	-2.82731
Clostridium cuniculi	-3.46444	-2.87716	-2.83546
Frisingicoccus caecimuris	-3.23309	-3.69914	-2.83864
Hespellia stercorisuis	-3.16419	-3.38887	-2.83916
Bacteroides finegoldii	0	0	-2.8479
Bacteroides fluxus	-3.02617	-3.17862	-2.85848
Inconstantimicrobium porci	-3.09199	0	-2.87808
Agathobaculum butyriciproducens	-3.27568	-2.92932	-2.9023
Blautia massiliensis	-3.10329	-2.85482	-2.90884
Robinsoniella peoriensis	-3.28628	-3.30486	-2.93953
Treponema porcinum	-3.46105	-3.5009	-2.95002
Ruminococcus bromii	-3.02988	-3.1244	-2.96449
Waltera intestinalis	-3.08772	-3.43781	-2.97053
Gemmiger formicilis	-3.16466	-3.23138	-2.97331
Limosilactobacillus fermentum	0	-3.82746	-2.98146
Anaerovibrio slackiae	-3.20684	-3.21523	-3.0042
Anaerovorax odorimutans	-3.60422	-3.69231	-3.02065
Mitsuokella jalaludinii	-3.68804	-3.41279	-3.02194
Gemmiger gallinarum	-3.4185	-3.66868	-3.03404
Lactobacillus gallinarum	-3.40555	-3.53224	-3.043
[Ruminococcus] torques	-3.37504	-3.35885	-3.06594
Anaerobacterium chartisolvens	-3.62926	-3.51615	-3.10891
Limosilactobacillus alvi	-3.38757	-3.26034	-3.12517
Catenibacterium mitsuokai	-3.48892	-3.74272	-3.12523
Terrisporobacter petrolearius	0	0	-3.1347
Holdemanella porci	-3.28879	-3.37065	-3.15228
Ligilactobacillus saerimneri	0	0	-3.15234
Eubacterium coprostanoligenes	-3.61633	-3.69939	-3.17905
Clostridium jeddahense	-3.26473	-3.30423	-3.20314
Secundilactobacillus similis	0	0	-3.21157
Acetivibrio ethanolgignens	-3.40523	-3.51188	-3.22939
Collinsella bouchesdurhonensis	-4.02085	-3.98675	-3.2568
Angelakisella massiliensis	-3.37872	-3.68147	-3.25714
Anaerostipes hominis	-3.60261	-3.98469	-3.29334
Clostridium aminobutyricum	-3.77452	-3.49549	-3.29885
Prevotella illustrans	0	-3.32548	-3.31509
Eubacterium ventriosum	-3.67027	0	-3.33809
Prevotella salivae	-3.35032	-3.24152	-3.33902
Mogibacterium kristiansenii	-3.57134	-3.93082	-3.37349
Roseburia inulinivorans	-3.89629	-3.83011	-3.37526
Faecalicatena fissicatena	0	-3.46	-3.40512
Paraprevotella clara	-3.57626	-3.21358	-3.42336
Metaprevotella massiliensis	-2.99596	-3.4174	-3.43698
Blautia intestinalis	-4.08018	-3.70924	-3.44409
Blautia glucerasea	-4.16755	-4.00802	-3.46077
Agathobacter ruminis	-4.00919	-3.63753	-3.46905
Hallerella porci	-3.27884	0	-3.47244
Faecalibacterium longum	-3.36576	-3.4751	-3.47426
Eubacterium oxidoreducens	-4.26331	0	-3.48168
Eisenbergiella massiliensis	-3.74152	-3.62043	-3.48748
Butyrivibrio fibrisolvens	-4.07555	0	-3.49159
Marseilla massiliensis	0	0	-3.50139
Anaerostipes faecalis	-3.95387	-3.47683	-3.52413
Treponema bryantii	-3.79188	-4.02683	-3.52953
Megasphaera hutchinsoni	-4.0674	0	-3.53592
Mediterraneibacter faecis	-3.5563	-3.47169	-3.54238
Ellagibacter isourolithinifaciens	-3.54648	-3.78092	-3.54445
Bifidobacterium reuteri	0	-4.32201	-3.55915
Williamwhitmania taraxaci	-3.8994	-3.68544	-3.58448
Gallibacter intestinalis	-4.06587	-4.21713	-3.60005
Pseudoflavonifractor phocaeensis	-3.93586	-3.65239	-3.60675
Desulfonispora thiosulfatigenes	0	0	-3.61117
Butyricicoccus pullicaecorum	-4.49515	0	-3.61661
Clostridium puniceum	0	0	-3.63953
Selenomonas montiformis	-3.72972	-3.97372	-3.66248
Alcanivorax profundi	-3.88388	-4.1206	-3.67449
Solobacterium moorei	0	0	-3.68358
Baileyella intestinalis	-4.18422	0	-3.71791
Paramuribaculum intestinale	0	0	-3.74038
Holdemanella biformis	-3.8516	0	-3.74427
Alistipes shahii	-3.66239	-4.02487	-3.7503
Elizabethkingia argenteiflava	-4.14692	-4.16263	-3.75365
Prevotella falsenii	0	0	-3.7626
Ligilactobacillus equi	-4.12441	-4.30534	-3.76368
Bacteroides eggerthii	-4.0726	0	-3.79492
Lachnospira multipara	-3.94477	-4.06883	-3.79534
Schinkia azotoformans	-4.1665	-4.28489	-3.79577
Bullifex porci	-4.14785	-4.25171	-3.80547
Butyricimonas synergistica	-3.85644	-4.00647	-3.80553
Atopostipes suicloacalis	0	0	-3.81696
Thalassococcus profundi	-4.56611	0	-3.82448
Velocimicrobium porci	-3.54051	-3.86403	-3.85172
Ruminococcus callidus	-3.70382	-3.85285	-3.8602
Eubacterium xylanophilum	-3.60539	-3.91017	-3.87323
Ligilactobacillus pobuzihii	-4.36957	-4.13367	-3.8759
Bilifractor porci	-4.00708	-3.87353	-3.8768
Romboutsia timonensis	0	0	-3.87859
Ruminiclostridium hungatei	-4.00233	-3.88788	-3.87885
Blautia obeum	0	0	-3.87962
Evtepia gabavorous	-3.44705	-3.21715	-3.88116
Anaerotignum neopropionicum	0	0	-3.91081
Absicoccus porci	0	0	-3.91137
Limosilactobacillus panis	0	0	-3.92686
Alishewanella longhuensis	-4.82154	-4.31492	-3.9382
Primorskyibacter marinus	0	0	-3.94323
Leuconostoc falkenbergense	0	0	-3.94592
Eubacterium ramulus	-4.06467	-4.27515	-3.94787
Prevotella albensis	0	0	-3.969
Pseudoscardovia suis	0	0	-4.00148
Neobacillus bataviensis	0	0	-4.00182
Lachnoclostridium pacaense	0	0	-4.008
Granulicatella balaenopterae	-3.92853	-3.74756	-4.00904
Nesterenkonia natronophila	-4.14446	-4.03322	-4.05391
Prevotella lascolaii	0	0	-4.16054
Myxococcus llanfairpwllgwyngyllgogerychwyrndrobwllllantysiliogogogochensis	0	0	-4.20553
Amycolatopsis rifamycinica	0	0	-4.27193
Drancourtella massiliensis	0	-3.44669	-4.34657
Slackia isoflavoniconvertens	0	-4.05427	-4.48219
Bombilactobacillus mellifer	0	0	-4.58651
Paenibacillus azotifigens	0	0	-4.6476
Sinanaerobacter chloroacetimidivorans	0	-3.00669	0
Lactobacillus crispatus	0	-3.12257	0
Lactobacillus gigeriorum	0	-3.19479	0
Limosilactobacillus portuensis	0	-3.2461	0
Massiliimalia timonensis	0	-3.28127	0
Lactiplantibacillus plantarum	0	-3.40172	0
Terrisporobacter glycolicus	-3.43092	0	0
Streptococcus hyovaginalis	0	-3.44301	0
Holdemania massiliensis	-3.46664	0	0
Negativibacillus massiliensis	0	-3.57506	0
Acetobacteroides hydrogenigenes	-3.58905	0	0
Amylolactobacillus amylotrophicus	-3.62826	0	0
Clostridium uliginosum	-3.65998	0	0
Candidatus Soleaferrea massiliensis	0	-3.68256	0
Clostridium chromiireducens	-3.70033	0	0
Enterocloster aldenensis	0	-3.70035	0
Acetanaerobacterium elongatum	-3.7531	0	0
Lachnospira pectinoschiza	-3.78754	0	0
Mediterraneibacter glycyrrhizinilyticus	-3.80783	0	0
Streptococcus vicugnae	-1.87026	-1.97202	0
Paraeggerthella hongkongensis	0	-3.84658	0
Terrisporobacter mayombei	-3.84672	0	0
Succinatimonas hippei	0	-3.85291	0
Tyzzerella nexilis	-3.88	0	0
Ruminococcus gauvreauii	-3.88358	0	0
Pseudomonas saudimassiliensis	-3.88858	0	0
Xylanivirga thermophila	-3.8945	0	0
Prevotellamassilia timonensis	0	-3.9126	0
Ructibacterium gallinarum	0	-3.94539	0
Bacteroides gallinaceum	-3.95115	0	0
Anaerococcus faecalis	-3.9997	0	0
Clostridium saudiense	0	-4.05395	0
Hungatella hathewayi	-4.0583	0	0
Leuconostoc fallax	0	-4.06651	0
Faecalibacillus faecis	0	-4.10031	0
Paucilactobacillus nenjiangensis	0	-4.12715	0
Prevotella ihumii	-4.19434	0	0
Fournierella massiliensis	-4.21041	0	0
Faecalitalea cylindroides	-4.22086	0	0
Floccifex porci	-4.24132	0	0
Limosilactobacillus urinaemulieris	-4.24641	0	0
Companilactobacillus nuruki	-4.26432	0	0
Hornefia butyriciproducens	0	-4.28517	0
Mordavella massiliensis	0	-4.30678	0
Heminiphilus faecis	-4.34016	0	0
Anaerococcus porci	0	-4.34058	0
Enorma burkinafasonensis	-4.34198	0	0
Megasphaera hexanoica	0	-4.36129	0
Streptococcus plurextorum	0	-4.36588	0
Lacrimispora amygdalina	0	-4.37253	0
Ruoffia tabacinasalis	0	-4.37303	0
Acetitomaculum ruminis	-4.37314	0	0
Blautia caecimuris	-4.40076	0	0
Blautia schinkii	-4.40954	0	0
Alkalibacterium gilvum	0	-4.42933	0
Clostridium sardiniense	0	-4.44526	0
Clostridium fessum	0	-4.47221	0
Pontibacillus litoralis	-4.52744	0	0
Slackia equolifaciens	0	-4.70877	0
Lactobacillus kalixensis	-4.75538	0	0
Treponema zioleckii	-4.76332	0	0
Bacteroides ndongoniae	-2.39062	-2.50824	0
Lactobacillus nasalidis	0	-4.93647	0
Flavivirga rizhaonensis	0	-5.00403	0
Hydrogenoanaerobacterium saccharovorans	-3.06657	-3.14415	0
Prevotella marshii	-3.16908	-3.1382	0
Helcococcus massiliensis	-3.30727	-3.26804	0
Caproiciproducens galactitolivorans	-3.31098	-3.4535	0
Campylobacter jejuni	-3.5868	-3.49847	0
Prevotella rara	-3.57892	-3.64019	0
[Ruminococcus] lactaris	-3.8475	-3.56791	0
Prevotella nanceiensis	-3.61977	-3.91271	0
Enterocloster lavalensis	-3.98798	-3.94665	0
Selenomonas bovis	-4.01089	-3.93013	0
Murimonas intestini	-3.96177	-4.2904	0
Treponema berlinense	-3.89325	-4.35966	0
Butyrivibrio crossotus	-4.2801	-4.12242	0
Eubacterium ruminantium	-4.37806	-4.0463	0
Hallella seregens	-4.27356	-4.19477	0
Duncaniella muris	-4.42617	-4.08632	0
Prevotella buccalis	-4.23274	-4.42326	0
Desulfovibrio piger	-4.58669	-4.156	0
Anaerovibrio lipolyticus	-4.46753	-4.27864	0
Streptococcus vaginalis	-4.58937	-4.27596	0
Alteribacter natronophilus	-4.39971	-5.06387	0

## Sheet: G3_four
species_name	G3_four_rep1	G3_four_rep2	G3_four_rep3
Lactobacillus amylovorus	0.815432	0.822136	0.656428
Porphyromonadaceae bacterium	0.0439413	0.0776632	0.0742071
Streptococcus alactolyticus	-0.0825119	-0.0359271	-0.150215
Limosilactobacillus reuteri	-0.227413	-0.275692	-0.362779
Prevotella copri	0	0	-0.387032
Klebsiella quasipneumoniae	-0.780762	-0.670375	-0.688268
Eubacterium pyruvativorans	-1.54774	-1.5064	-1.48599
Treponema porcinum	-1.78779	-1.64448	-1.7226
Streptococcus vicugnae	-1.9271	-1.78299	-1.7534
Bifidobacterium boum	-2.15426	-2.33261	-1.83213
Aureimonas psammosilenae	-1.51919	-1.8314	-1.85501
Bittarella massiliensis	0	0	-1.88812
Bifidobacterium porcinum	-1.98166	-2.1904	-1.89797
Mediterraneibacter catenae	-2.17586	-2.14766	-1.92705
Prevotella hominis	-1.93575	-1.88787	-1.94955
Clostridium celatum	-2.058	-1.98777	-1.95907
Phascolarctobacterium succinatutens	-2.01461	-1.98618	-1.98757
Butyricicoccus faecihominis	-2.19809	-2.40063	-2.27896
Bulleidia extructa	-2.18985	-2.42776	-2.27523
Prevotella pectinovora	-2.67793	-2.40765	-2.29039
Oliverpabstia intestinalis	-2.29254	-2.35232	-2.29291
Dorea longicatena	-2.44381	0	-2.3509
Fusicatenibacter saccharivorans	-3.38849	-2.05672	-2.36273
Butyricicoccus porcorum	-2.22608	-2.37559	-2.42688
Clostridium vitabionis	-2.54258	-2.35088	-2.44652
Anaerovibrio slackiae	-2.93259	-2.83265	-2.4888
Blautia wexlerae	-2.66546	-2.55424	-2.52175
Clostridium indicum	-2.76696	-2.55965	-2.53706
Lactobacillus crispatus	-2.61986	-2.51823	-2.56515
Blautia massiliensis	-2.75309	-2.76243	-2.57139
Prevotella mizrahii	-2.58325	-2.55155	-2.58934
Anaerostipes faecalis	-1.86413	-3.49454	-2.6126
Anaerobium acetethylicum	-2.80635	-2.66881	-2.63086
Clostridium jeddahense	0	-2.89178	-2.63664
Sporobacter termitidis	-2.65862	-2.59624	-2.64007
Faecalicoccus acidiformans	-2.78528	-2.82586	-2.64448
Clostridium porci	-2.57242	-2.59624	-2.69033
Oscillibacter ruminantium	-2.81571	-2.58449	-2.66775
Roseburia porci	-2.71002	-2.56246	-2.74765
Clostridium cuniculi	-2.98419	-2.78276	-2.77042
Prevotella marshii	0	-2.66316	-2.78183
Phocea massiliensis	-1.8948	-1.91443	-2.78381
Faecalicatena faecalis	-2.57845	-2.64328	-2.78781
Anaerobutyricum soehngenii	-2.79148	-2.5547	-2.79291
Bifidobacterium thermophilum	-2.7487	-2.79019	-2.83007
Holdemania massiliensis	0	-2.86797	-2.84691
Terrisporobacter othiniensis	-2.94046	-2.66	-2.86448
Sinanaerobacter chloroacetimidivorans	0	-2.73903	-2.88294
Phocaeicola massiliensis	-2.87136	0	-2.91177
Holdemanella porci	-2.5761	-2.62423	-2.94148
Prevotella stercorea	-1.91053	-3.30964	-3.01051
Nesterenkonia natronophila	-3.01282	-2.69445	-2.73458
Streptococcus plurextorum	0	-4.1222	-4.35091
Blautia intestinalis	0	-4.48597	-4.01078
Lactobacillus porci	-2.81986	-3.25892	-2.64492
Blautia producta	-3.01628	-2.98146	-2.75989
Bacteroides mediterraneensis	-3.0273	-2.95851	-2.82322
Prevotella colorans	-3.06453	-2.93211	-2.88459
Ruminococcus flavefaciens	-3.16872	-2.8019	-2.94066
Ruminococcus bromii	-2.92087	-2.93669	-3.05949
Clostridium fessum	-4.20111	0	-4.17388
Baileyella intestinalis	0	-3.95693	-4.42066
Bacteroides fluxus	-3.01829	-2.94263	-2.95977
Bacteroides zhangwenhongi	-3.22554	-2.50692	-3.23961
Clostridium disporicum	-3.1515	-3.06905	-2.76961
Waltera intestinalis	-2.92714	-2.93232	-3.16149
Agathobaculum butyriciproducens	-3.24735	-2.98826	-2.79139
Oribacterium asaccharolyticum	-2.82988	-3.32522	-2.91314
Prevotella buccalis	0	-4.4406	-4.63563
Roseburia faecis	-2.7102	-3.38455	-3.03958
Angelakisella massiliensis	-3.27281	-2.94718	-2.96392
Hydrogenoanaerobacterium saccharovorans	-3.24195	-2.93984	-3.00995
Mediterranea massiliensis	-3.26349	-2.95915	-3.00193
Agathobacter ruminis	-3.19007	-3.05532	-3.0129
Floccifex porci	-3.24378	-3.01133	-3.30993
Alloprevotella rava	-3.81021	-2.92609	-2.83023
Mediterraneibacter faecis	-2.94294	-3.42908	-3.22164
Paraprevotella clara	-3.40978	-3.15857	-3.15389
Blautia luti	-3.22992	-3.25707	-3.25707
Robinsoniella peoriensis	-3.3763	-2.9931	-3.45315
Bowmanella dokdonensis	0	-4.75792	-5.07076
Lactobacillus xujianguonis	-3.3799	-3.3173	-3.17972
Eubacterium coprostanoligenes	-3.46121	-3.37695	-3.08771
Ruminococcus gauvreauii	-3.35559	-3.34668	-3.22521
[Ruminococcus] torques	-3.24631	-3.55624	-3.3214
Acetivibrio ethanolgignens	-3.38423	-3.42531	-3.41571
Alteribacter natronophilus	-3.66781	-3.18452	-3.41264
Hespellia stercorisuis	-3.48633	-3.47345	-3.31252
Frisingicoccus caecimuris	-3.63879	-3.29868	-3.42376
Ruminococcus callidus	-3.41899	-3.17443	-3.76992
Agrilactobacillus composti	0	-3.82335	-4.46911
Prevotella salivae	-3.19134	-4.22196	-3.04412
Metaprevotella massiliensis	-3.37984	-3.53738	-3.57057
Gemmiger formicilis	-3.26174	-4.0575	-3.26173
Roseburia inulinivorans	-3.74319	-3.21803	-3.72355
Eisenbergiella porci	-3.49139	-3.62458	-3.56924
Ructibacterium gallinarum	-3.62739	-3.47365	-3.62548
Treponema berlinense	-3.57873	-3.71313	-3.45649
Butyricicoccus pullicaecorum	-3.5969	-3.49961	-3.74682
Blautia glucerasea	-3.3219	-4.01559	-3.86489
Eubacterium xylanophilum	-4.15831	0	-4.00128
Mailhella massiliensis	-3.72106	-4.04559	-3.52109
Velocimicrobium porci	-4.2343	-3.81562	-3.27231
Pseudoflavonifractor phocaeensis	-4.13857	-3.48167	-3.72938
Thalassococcus profundi	-3.53889	-3.52764	-4.3708
Myxococcus llanfairpwllgwyngyllgogerychwyrndrobwllllantysiliogogogochensis	-3.57097	-3.81719	-4.09984
Ruminiclostridium hungatei	-4.03624	-3.78042	-3.87589
Bullifex porci	-4.02882	-3.74288	-4.36851
Schinkia azotoformans	0	-3.91117	-4.16829
Granulicatella balaenopterae	-3.84804	0	-3.96203
Slackia isoflavoniconvertens	-4.0804	-3.77528	0
Elizabethkingia argenteiflava	-4.04251	-4.08824	-4.20277
[Ruminococcus] lactaris	-3.99068	-4.12522	-4.30824
Alcanivorax profundi	-3.9598	-4.45743	-4.21186
Lactobacillus kitasatonis	-4.07048	-4.29846	-4.43508
Neobacillus bataviensis	-4.41176	-4.43371	-4.24194
Paenibacillus azotifigens	-4.75432	-4.49141	-5.06667
Pontibacillus litoralis	0	-3.8296	-3.93389
Bacteroides acidifaciens	-2.32151	0	0
Bariatricus massiliensis	0	-2.56194	0
Bacteroides gallinarum	-2.64802	0	0
Dorea formicigenerans	0	0	-2.78607
Agathobaculum desmolans	0	-2.83647	0
Bacteroides kribbi	-2.84275	0	0
Streptococcus macedonicus	-3.03066	0	0
Prevotella brunnea	0	0	-3.05883
Prevotella aurantiaca	0	-3.09491	0
Caproiciproducens galactitolivorans	0	0	-3.18197
Heminiphilus faecis	-3.20267	0	0
Terrisporobacter glycolicus	-3.24038	0	0
Enterocloster aldenensis	0	-3.26322	0
Massiliimalia timonensis	-3.26651	0	0
Holdemanella biformis	0	0	-3.29357
Intestinimonas gabonensis	0	-3.32538	0
Pseudoruminococcus massiliensis	-3.38675	0	0
Sharpea porci	0	0	-3.40832
Catenibacterium mitsuokai	-3.41802	0	0
Leeuwenhoekiella nanhaiensis	0	-3.42077	0
Lactobacillus gallinarum	-3.42528	0	0
Prevotella illustrans	0	0	-3.43299
Clostridium saudiense	0	-3.44102	0
Anaerovorax odorimutans	0	-3.44613	0
Merdimonas faecis	0	0	-3.51831
Clostridium paraputrificum	0	-3.54478	0
Caldibacillus hisashii	0	-3.56236	0
Prevotellamassilia timonensis	0	-3.63258	0
Enterocloster lavalensis	0	0	-3.64516
Terrisporobacter petrolearius	0	-3.66037	0
Terrisporobacter mayombei	0	0	-3.67295
Desulfonispora thiosulfatigenes	0	0	-3.70116
Anaerobutyricum hallii	0	0	-3.70476
Prevotella falsenii	-3.71801	0	0
Bacteroides rodentium	0	0	-3.74472
Sutterella parvirubra	0	0	-3.75263
Limosilactobacillus fermentum	0	-3.75461	0
Blautia obeum	-3.76868	0	0
Ellagibacter isourolithinifaciens	0	0	-3.82519
Williamwhitmania taraxaci	0	0	-3.83665
Algibacillus agarilyticus	0	0	-3.84625
Pseudoscardovia radai	-3.85349	0	0
Paramuribaculum intestinale	-3.88066	0	0
Murimonas intestini	0	0	-3.9327
Duncaniella muris	0	0	-3.95435
Hallella seregens	0	-3.96814	0
Eubacterium oxidoreducens	0	0	-3.98048
Bacteroides eggerthii	0	-3.98314	0
Drancourtella massiliensis	-3.98579	0	0
Heliomicrobium undosum	-3.99615	0	0
Eubacterium ramulus	0	0	-4.00537
Lapidilactobacillus concavus	0	-4.01716	0
Lactobacillus equicursoris	0	-4.01729	0
Anaerosacchariphilus polymeriproducens	0	-4.02084	0
Clostridium sartagoforme	0	-4.0227	0
Xylanivirga thermophila	-4.02544	0	0
Ruegeria haliotis	0	-4.04924	0
Anaerotignum neopropionicum	0	0	-4.05271
Blautia caecimuris	0	-4.0674	0
Lacrimispora algidixylanolytica	0	0	-4.07191
Mordavella massiliensis	0	0	-4.0799
Intestinibacillus massiliensis	0	0	-4.0877
Gallibacter intestinalis	0	-4.09284	0
Evtepia gabavorous	0	0	-4.10479
Corynebacterium striatum	0	-4.11756	0
Sellimonas caecigallum	0	0	-4.1559
Blautia schinkii	0	-4.16755	0
Blautia faecis	-4.20238	0	0
Acetivibrio mesophilus	0	-4.20427	0
Solobacterium moorei	0	-4.23216	0
Chryseobacterium binzhouense	-4.23339	0	0
Ruthenibacterium lactatiformans	0	-4.24481	0
Mogibacterium kristiansenii	0	0	-4.28018
Fibrobacter intestinalis	0	0	-4.29069
Peptococcus niger	0	0	-4.30091
Fournierella massiliensis	0	0	-4.33824
Prevotella albensis	0	0	-4.35248
Achromobacter aestuarii	0	0	-4.36721
Algoriphagus oliviformis	0	0	-4.47117
Adlercreutzia muris	0	0	-4.52622
Coprococcus catus	0	0	-4.5464
Ligilactobacillus equi	0	-4.56716	0
Anaerocolumna jejuensis	0	0	-4.57908
Flavobacterium tibetense	0	-4.58038	0
Vibrio ouci	0	-4.72863	0
Bacillus cabrialesii	0	0	-4.80842
Psychroflexus lacisalsi	0	-4.89209	0
Acetobacter sacchari	0	-4.90002	0
Virgibacillus indicus	0	0	-4.90578
Bacteroides caecigallinarum	0	0	-5.00664
Flavivirga rizhaonensis	0	0	-5.01236
Oceanobacillus salinisoli	0	0	-5.14406
Desulfovibrio piger	-4.23658	-3.70475	0
Butyrivibrio fibrisolvens	0	-3.70335	-4.24809
Streptococcus equinus	0	-3.07529	-3.05472
[Eubacterium] cellulosolvens	-3.08046	-3.09525	0
Prevotella oralis	0	-3.00875	-3.17052
Dorea phocaeensis	0	-3.34489	-3.269
Streptococcus thermophilus	0	-3.32469	-3.36851
Slackia faecicanis	-3.51886	-3.27421	0
Faecalicatena fissicatena	0	-3.20698	-3.10688
Butyrivibrio crossotus	0	-3.08591	-3.24124
Prevotella nanceiensis	0	-3.34791	-3.0539
Lachnospira multipara	0	-3.31428	-3.17955
Inconstantimicrobium porci	0	-3.6238	-3.29351
Faecalibacterium longum	0	-3.59034	-3.39511
Clostridium aminobutyricum	0	-3.62737	-3.39964
Anaerobacterium chartisolvens	-3.65031	0	-3.4859
Desulfohalotomaculum alkaliphilum	-3.59916	0	-3.5518
Limosilactobacillus alvi	-3.65555	0	-3.58716
Pseudoflavonifractor gallinarum	0	-3.54004	-3.71313
Anaerostipes hominis	0	-3.60656	-3.64776
Mitsuokella jalaludinii	0	-3.32548	-3.95707
Bifidobacterium apri	0	-3.60656	-3.7889
Megasphaera hexanoica	0	-3.35607	-4.05035
Alistipes shahii	-3.89031	0	-3.51675
Gemmiger gallinarum	0	-3.62935	-3.81085
Hallerella porci	-3.77699	0	-3.7543
Tyzzerella nexilis	0	-3.70233	-3.887
Blautia stercoris	0	-3.28415	-4.3183
Treponema bryantii	0	-3.94645	-3.65762
Hungatella hathewayi	0	-3.5709	-4.09547
Anaerovibrio lipolyticus	-3.73737	0	-3.95726
Absicoccus porci	-3.71292	0	-4.00198
Bifidobacterium reuteri	0	-3.8621	-3.85347
Clostridium puniceum	0	-4.03508	-3.68707

## Sheet: G3_eight
species_name	G3_eight_rep1	G3_eight_rep2	G3_eight_rep3
Lactobacillus amylovorus	0.706705	0.725253	0.972743
Porphyromonadaceae bacterium	0.11673	0.165424	0.498101
Streptococcus alactolyticus	-0.251123	-0.214913	0.0216996
Klebsiella quasipneumoniae	-0.603105	-0.596247	-0.231328
Limosilactobacillus reuteri	-3.1643	-0.532474	-0.585695
Eubacterium pyruvativorans	-1.4051	-1.35796	-1.01937
Streptococcus vicugnae	-1.56457	-1.52042	-1.27582
Treponema porcinum	-1.55147	-1.58256	-1.2867
Clostridium celatum	-1.74846	-1.69917	-1.37602
Phascolarctobacterium succinatutens	-1.91555	-1.88145	-1.56428
Prevotella hominis	-1.94395	-1.83433	-1.5866
Phocea massiliensis	-1.71422	-1.96574	-1.59873
Prevotella stercorea	-1.88829	-1.95863	-1.60321
Mediterraneibacter catenae	-1.95352	-1.85513	-1.62183
Aureimonas psammosilenae	-1.73873	-1.89763	-1.62621
Bifidobacterium boum	-3.43497	-2.2203	-1.67106
Bifidobacterium porcinum	-2.55106	-2.33311	-1.67854
Bacteroides acidifaciens	-2.06743	0	0
Bulleidia extructa	-2.08308	-2.08319	-1.79501
Roseburia faecis	-2.36315	-2.19934	-1.81705
Blautia wexlerae	-2.42877	-2.21684	-1.89886
Bacteroides ndongoniae	0	0	-1.92781
Oscillibacter ruminantium	-2.55055	-2.31434	-1.93908
Prevotella pectinovora	-2.59495	-2.39911	-1.945
Bariatricus massiliensis	0	0	-1.98715
Enterococcus faecalis	-2.13242	0	0
Bacteroides kribbi	0	-2.46044	0
Clostridium minihomine	-2.71882	0	0
Hydrogenoanaerobacterium saccharovorans	0	-2.93701	0
Clostridium paraputrificum	-2.98059	0	0
Sporobacter termitidis	-2.3728	-2.42707	-1.99057
Butyricicoccus porcorum	-2.19541	-2.23144	-2.01647
Clostridium vitabionis	-2.23999	-2.30766	-2.03141
Prevotella mizrahii	-2.45626	-2.51067	-2.08161
Oliverpabstia intestinalis	-2.32589	-2.35132	-2.08338
Anaerovibrio slackiae	-2.95951	-2.64189	-2.15164
Nesterenkonia natronophila	-2.51847	-2.49669	-2.1534
Bifidobacterium thermophilum	0	-2.73752	-2.15634
Butyricicoccus faecihominis	-3.72231	-2.15277	-2.1826
Clostridium indicum	-2.54206	-2.64246	-2.23296
Alloprevotella rava	-2.72647	-2.6622	-2.23758
Faecalicoccus acidiformans	-2.70625	-2.58485	-2.26049
Prevotella brunnea	0	0	-2.26534
Ruminococcus bromii	0	-2.78436	-2.28652
Prevotella marshii	-2.54852	-2.73261	-2.30023
Clostridium porci	-2.72053	-2.59002	-2.31411
Bacteroides zhangwenhongi	-3.09221	-2.64913	-2.32201
Blautia producta	-2.41736	-2.67328	-2.3326
Prevotella nanceiensis	-3.13559	-3.19477	-2.3436
Faecalicatena faecalis	-2.73258	-2.63237	-2.34657
Clostridium cuniculi	-2.55228	-2.59818	-2.35542
Terrisporobacter othiniensis	-2.81301	-2.45694	-2.35886
Oribacterium asaccharolyticum	-2.80469	-2.76325	-2.3607
Lactobacillus crispatus	0	-2.6035	-2.36638
Ruminococcus flavefaciens	-2.48892	-2.59912	-2.37415
Prevotella colorans	-2.64034	-2.68189	-2.38137
Roseburia porci	-2.61586	-2.5663	-2.38514
Sinanaerobacter chloroacetimidivorans	-2.64032	-2.79946	-2.40424
Bacteroides mediterraneensis	-2.77118	-2.93043	-2.42495
Bacteroides gallinarum	0	0	-2.4317
Eisenbergiella porci	-3.61691	-2.58783	-2.43657
Mediterranea massiliensis	-2.81963	-2.87891	-2.44198
Holdemania massiliensis	-2.90564	-2.62548	-2.44992
Paraprevotella clara	-2.93235	-2.78452	-2.46288
Angelakisella massiliensis	-2.7856	-2.83682	-2.46828
Anaerobium acetethylicum	-2.57008	-2.57534	-2.50106
Agathobacter ruminis	-2.67669	-2.80172	-2.52091
Blautia massiliensis	-2.40104	-2.4679	-2.52712
Clostridium jeddahense	0	-3.05007	-2.54285
Fusicatenibacter saccharivorans	-2.72214	-3.06124	-2.56112
Phocaeicola massiliensis	0	0	-2.56987
Alteribacter natronophilus	-3.00912	-3.0015	-2.57774
Clostridium disporicum	-2.67622	-2.88897	-2.5912
Waltera intestinalis	-2.98244	-2.9232	-2.60778
Butyrivibrio crossotus	-2.807	-3.25637	-2.62428
Agathobaculum butyriciproducens	-2.8421	-2.90647	-2.62708
[Ruminococcus] torques	-3.02269	-2.91225	-2.67541
Anaerobutyricum soehngenii	-3.06598	-2.9428	-2.68493
Massiliimalia massiliensis	0	0	-2.69981
Velocimicrobium porci	-3.26567	-3.29229	-2.70447
Ruminococcus gauvreauii	-3.40063	-3.74517	-2.75091
Lactobacillus porci	-3.00011	-3.21576	-2.75703
Hornefia butyriciproducens	0	-3.06531	-2.77406
Terrisporobacter glycolicus	-3.38498	0	-2.78082
Faecalibacterium longum	-3.1857	-3.3368	-2.78443
Bacteroides fluxus	-3.19154	-2.79699	-2.78689
Robinsoniella peoriensis	-2.76851	-2.65158	-2.79575
Caproiciproducens galactitolivorans	0	0	-2.80845
Anaerovorax odorimutans	0	0	-2.82814
Mediterraneibacter glycyrrhizinilyticus	0	-3.2195	-2.82972
Lachnospira multipara	-3.53771	-3.32375	-2.83684
Mitsuokella jalaludinii	0	-3.31575	-2.84022
Hespellia stercorisuis	-2.86128	-3.04436	-2.84533
Faecalicatena fissicatena	0	-2.92768	-2.85594
Prevotella illustrans	-3.57967	-3.04721	-2.8703
Roseburia inulinivorans	-3.50031	-3.52906	-2.87383
Lactobacillus xujianguonis	-3.20842	-3.03554	-2.88753
Metaprevotella massiliensis	-3.30477	-2.96502	-2.89352
Mediterraneibacter faecis	-3.05278	-3.02215	-2.90737
Treponema berlinense	-3.20449	-3.45742	-2.9321
Holdemanella porci	-3.24372	-3.09899	-2.93902
Ruminococcus callidus	-4.29761	0	-2.95991
Gemmiger formicilis	-3.0581	-3.29388	-2.98272
Blautia luti	-3.44325	-3.22794	-3.01466
Bifidobacterium apri	-3.36253	-3.60481	-3.01848
Clostridium puniceum	0	0	-3.02211
Prevotella salivae	0	-3.37076	-3.02308
Pseudoflavonifractor phocaeensis	-3.19787	-3.56408	-3.02988
Frisingicoccus caecimuris	-3.39738	-3.37258	-3.04019
Desulfonispora thiosulfatigenes	0	0	-3.10364
Agathobaculum desmolans	-3.15114	-3.27242	-3.10459
Alistipes shahii	-3.36388	-3.89272	-3.10642
Butyricicoccus pullicaecorum	-3.46243	-3.41773	-3.11539
Acetivibrio ethanolgignens	-3.34863	-3.22952	-3.11819
Hallerella porci	0	-3.4289	-3.12117
Eubacterium coprostanoligenes	-3.41613	-3.12717	-3.12638
Ruminiclostridium hungatei	0	0	-3.12868
Granulicatella balaenopterae	-3.61294	-3.59929	-3.15709
Thalassococcus profundi	0	0	-3.18602
Enterocloster aldenensis	0	0	-3.21348
Ructibacterium gallinarum	-3.33779	-3.66843	-3.227
Treponema bryantii	-3.3331	-3.63507	-3.22845
Merdimonas faecis	0	-3.49998	-3.2286
Desulfovibrio piger	-3.68084	-3.63843	-3.24249
Blautia intestinalis	-3.69385	-3.71534	-3.25343
Azonexus fungiphilus	0	0	-3.27127
Streptococcus thermophilus	-3.48062	0	-3.27176
Clostridium sartagoforme	0	0	-3.28091
Clostridium fessum	0	0	-3.2839
Williamwhitmania taraxaci	-3.81059	0	-3.28513
Butyrivibrio fibrisolvens	-3.50679	-3.45941	-3.29098
Duncaniella muris	0	-3.52374	-3.29299
Longibaculum muris	0	0	-3.29998
Clostridium saudiense	-4.01578	-4.13571	-3.31626
[Ruminococcus] lactaris	-3.4734	-3.84595	-3.33763
Clostridium aminobutyricum	-3.11389	-3.12584	-3.35318
Tyzzerella nexilis	-3.69376	-3.46568	-3.37342
Solobacterium moorei	0	-3.35827	-3.3741
Streptococcus vaginalis	0	-3.86282	-3.38678
Bacteroides eggerthii	0	0	-3.38785
Butyricimonas synergistica	-3.64002	0	-3.38887
Terrisporobacter mayombei	0	-3.28896	-3.39973
Prevotella falsenii	0	0	-3.42474
Blautia stercoris	-4.01649	0	-3.42984
Bullifex porci	-3.70079	-4.08849	-3.43289
Eisenbergiella massiliensis	-3.88096	-3.74027	-3.44223
Limosilactobacillus alvi	-3.53593	0	-3.44954
Elizabethkingia argenteiflava	-3.79904	-3.80571	-3.49598
Megasphaera hominis	0	0	-3.49883
Hallella seregens	0	-3.78714	-3.51653
Hungatella hathewayi	-3.60873	-3.64067	-3.51711
Eubacterium oxidoreducens	0	-3.26887	-3.52967
Ruegeria haliotis	0	0	-3.53094
Pontibacillus litoralis	0	-3.55529	-3.54583
Prevotella baroniae	-3.92382	0	-3.54669
Megasphaera hexanoica	0	-4.06244	-3.55934
Anaerostipes hominis	0	0	-3.58735
Paramuribaculum intestinale	0	-3.73147	-3.59974
Anaerobacterium chartisolvens	-3.32502	-3.22132	-3.61185
Bifidobacterium reuteri	0	0	-3.63421
Blautia glucerasea	-3.63424	-3.7028	-3.64195
Mordavella massiliensis	0	0	-3.64244
Myxococcus llanfairpwllgwyngyllgogerychwyrndrobwllllantysiliogogogochensis	-3.70278	-3.61619	-3.64418
Eubacterium xylanophilum	-3.62279	-3.73154	-3.70392
Clostridium akagii	0	0	-3.7124
Fournierella massiliensis	0	-3.51007	-3.71434
Prevotella rara	0	-3.93818	-3.73095
Lachnospira pectinoschiza	0	0	-3.73226
Absicoccus porci	0	0	-3.79503
Anaerosacchariphilus polymeriproducens	0	0	-3.80306
Blautia faecis	0	0	-3.80869
Alcanivorax profundi	-4.07227	-4.11224	-3.81047
Prevotella loescheii	0	0	-3.81959
Prevotella buccalis	0	0	-3.82581
Sharpea porci	0	-3.47859	-3.88533
Tetragenococcus solitarius	0	-4.08246	-3.88685
Agrilactobacillus composti	-4.08487	0	-3.88838
Faecalicatena orotica	0	0	-3.91614
Neobacillus bataviensis	0	-3.9928	-3.93885
Baileyella intestinalis	0	0	-3.96444
Mobilitalea sibirica	0	0	-3.96647
Peptococcus niger	0	-4.02443	-3.98563
Lactobacillus helveticus	0	0	-3.99685
Lactobacillus kitasatonis	-3.55514	-4.24034	-4.03878
Paenibacillus azotifigens	-4.64168	-4.33409	-4.06596
Drancourtella massiliensis	0	-4.2852	-4.30939
Ligilactobacillus equi	0	0	-4.32213
Bowmanella dokdonensis	0	0	-4.48503
Streptococcus macedonicus	-3.02301	0	0
Blautia schinkii	0	-3.09186	0
Dorea phocaeensis	0	-3.12654	0
Negativibacillus massiliensis	-3.14731	0	0
Gemmiger gallinarum	0	-3.2398	0
Anaerobutyricum hallii	-3.33742	0	0
Limosilactobacillus portuensis	-3.36324	0	0
Enterocloster lavalensis	0	-3.59537	0
Ellagibacter isourolithinifaciens	-3.67067	0	0
Treponema zioleckii	0	-3.71915	0
Parabacteroides acidifaciens	0	-3.7234	0
Eggerthella timonensis	-3.7265	0	0
Mailhella massiliensis	0	-3.72672	0
Anaerotignum lactatifermentans	-3.76381	0	0
Prevotellamassilia timonensis	-3.80353	0	0
Prevotella albensis	0	-3.82691	0
Paraeggerthella hongkongensis	0	-3.83897	0
Flavobacterium oreochromis	-3.84435	0	0
Pseudoflavonifractor gallinarum	0	-3.84495	0
Limosilactobacillus urinaemulieris	-3.8531	0	0
Dysgonomonas massiliensis	-3.85334	0	0
Anaerotignum neopropionicum	-3.90159	0	0
Anaerostipes butyraticus	-3.90962	0	0
Murimonas intestini	-3.91018	0	0
Faecalibacillus faecis	-3.94391	0	0
Intestinimonas timonensis	-3.94848	0	0
Anaerostipes faecalis	0	-3.95973	0
Arenibacter lacus	0	-3.96331	0
Alistipes ihumii	-3.96562	0	0
Cellulosilyticum ruminicola	-3.96881	0	0
Eubacterium ventriosum	0	-3.96934	0
Lactobacillus gallinarum	-3.97332	0	0
Pseudobutyrivibrio ruminis	0	-3.98191	0
Desulfuribacillus alkaliarsenatis	-3.98314	0	0
Lacrimispora algidixylanolytica	0	-4.00344	0
Lapidilactobacillus concavus	0	-4.00581	0
Sellimonas caecigallum	0	-4.00607	0
Schinkia azotoformans	0	-4.03844	0
Desulfofundulus australicus	-4.04226	0	0
Collinsella bouchesdurhonensis	0	-4.0494	0
Fibrobacter intestinalis	0	-4.05558	0
Gallibacter intestinalis	0	-4.06335	0
Corynebacterium striatum	0	-4.07963	0
Taishania pollutisoli	0	-4.15538	0
Prevotella corporis	0	-4.1565	0
Intestinibacillus massiliensis	0	-4.31322	0
Puniceibacterium confluentis	0	-4.37475	0
Streptococcus hyovaginalis	-2.43121	-2.81688	0
Floccifex porci	-3.60859	-3.67783	0
Anaerovibrio lipolyticus	-3.8055	-3.81551	0
Streptococcus plurextorum	-4.00416	-3.78922	0
Holdemanella biformis	-3.68493	-4.29178	0
Limosilactobacillus panis	-3.96103	-4.06425	0
Bacteroides caecigallinarum	-4.02845	-4.8676	0

## Sheet: G4_four
species_name	G4_four_rep1	G4_four_rep2	G4_four_rep3
Lactobacillus amylovorus	0.21005	0.381196	0.485148
Megasphaera elsdenii	0.100105	0.201699	0.217382
Prevotella copri	0.010323	0.0851666	0.0905665
Porphyromonadaceae bacterium	-0.18904	-0.159098	-0.151837
Klebsiella quasipneumoniae	-0.9382	-0.931451	-0.881135
Blautia obeum	-1.49312	-1.50363	-1.34204
Eubacterium pyruvativorans	-1.69078	-1.66086	-1.54383
Prevotella hominis	-1.65445	-1.62089	-1.60406
Phocea massiliensis	-2.8493	-1.82266	-1.73236
Dorea formicigenerans	-1.90297	-1.90173	-1.79396
Bacteroides acidifaciens	-2.0287	-1.92653	-1.81429
Mediterraneibacter faecis	-2.00493	-1.93835	-1.86092
Treponema porcinum	-1.96219	-1.89568	-1.91245
Blautia massiliensis	-1.97406	-1.89974	-1.91368
Dorea longicatena	-2.00934	-1.93979	-1.94615
Prevotella pectinovora	-2.0384	-2.03177	-2.02358
Prevotella mizrahii	-2.1802	-2.16713	-2.03301
Fusicatenibacter saccharivorans	-2.49055	-2.15276	-2.11031
Prevotella stercorea	-2.20929	-2.12626	-2.12244
Oliverpabstia intestinalis	-2.15348	-2.14542	-2.1256
Megamonas rupellensis	-2.44131	-2.81042	-2.16724
Mediterraneibacter catenae	-2.36431	-2.22357	-2.21388
Bulleidia extructa	-2.3355	-2.39812	-2.21471
Butyricicoccus faecihominis	-2.2431	-2.19016	-2.21638
Clostridium celatum	-2.45235	-2.31965	-2.2545
Bacteroides kribbi	-2.29992	-2.12551	-2.25507
Phascolarctobacterium succinatutens	-2.31805	-2.26195	-2.27632
Mitsuokella jalaludinii	-2.41906	-2.39285	-2.28558
Hornefia butyriciproducens	-2.36036	-2.26252	-2.34109
Phocaeicola massiliensis	-2.63703	-2.52793	-2.38307
Prevotella brunnea	0	-2.57912	-2.40272
Gemmiger formicilis	-2.59692	-2.43619	-2.41341
Butyricicoccus porcorum	-2.57675	-2.49161	-2.42961
Bacteroides mediterraneensis	-2.65233	-2.45905	-2.44277
Clostridium vitabionis	-2.63385	-2.5337	-2.49591
Eubacterium coprostanoligenes	-2.55251	-2.58417	-2.51761
Anaerobutyricum soehngenii	-2.65194	-2.72722	-2.53212
Roseburia faecis	-2.64511	-2.55366	-2.57213
Blautia wexlerae	-2.84543	-2.79074	-2.59358
Bacteroides fluxus	-3.07498	-3.02047	-2.6947
Bariatricus massiliensis	-2.66132	-2.72056	-2.70908
Bacteroides zhangwenhongi	-2.69754	-2.83974	-2.71221
Anaerostipes faecalis	-3.62128	-2.65747	-2.72362
Holdemanella porci	-2.59227	-2.65562	-2.73158
Catenibacillus scindens	0	0	-2.73361
Faecalicoccus acidiformans	-2.68662	-2.76159	-2.75003
Selenomonas montiformis	-3.82787	-3.89622	-2.79966
Eisenbergiella porci	-3.2694	-3.25356	-2.81597
Agathobaculum desmolans	-3.54759	-3.73543	-2.85911
Alloprevotella rava	-3.05603	-2.98773	-2.88234
Blautia luti	-2.69707	-2.90701	-2.89964
Bifidobacterium boum	-2.74535	-2.77276	-2.92907
Faecalicatena faecalis	0	-3.7259	-2.94
Blautia producta	-2.88071	-2.96463	-2.96339
Clostridium indicum	-3.39873	-2.92404	-2.99159
Agathobaculum butyriciproducens	-3.03763	-2.90595	-2.99413
Prevotella oralis	-3.57258	0	-3.00379
Prevotella colorans	-3.21115	-3.02128	-3.01305
Bacteroides gallinarum	-3.13849	-3.08265	-3.02485
Terrisporobacter othiniensis	-2.8002	-2.84279	-3.04391
Clostridium porci	-3.07323	-3.3489	-3.05515
Clostridium disporicum	0	0	-3.0574
Faecalibacterium longum	-3.13631	-3.41804	-3.09158
Pediococcus parvulus	-3.07302	-3.29882	-3.093
Levilactobacillus paucivorans	-3.04421	-3.30686	-3.11252
Roseburia porci	-3.23988	-2.96664	-3.12122
Sinanaerobacter chloroacetimidivorans	-3.28808	-3.38703	-3.15345
Mediterranea massiliensis	-2.98045	-2.87299	-3.15349
Clostridium cuniculi	-3.20238	-3.19934	-3.15639
Oribacterium asaccharolyticum	-2.97927	-3.08875	-3.17904
Prevotella salivae	-2.97405	-3.32082	-3.18053
Caproiciproducens galactitolivorans	0	0	-3.1932
Ruminococcus bromii	-3.47065	-3.26068	-3.22695
Frisingicoccus caecimuris	-3.02325	-3.15069	-3.27015
Merdimonas faecis	-3.41489	-3.52598	-3.30522
Metaprevotella massiliensis	-3.50769	-3.33481	-3.30947
Pseudoflavonifractor phocaeensis	0	-3.26808	-3.32127
Blautia schinkii	-3.48471	-3.84917	-3.3618
Hespellia stercorisuis	-3.29749	-3.06214	-3.37018
Waltera intestinalis	-3.52404	-3.59738	-3.38018
Paraprevotella clara	-3.69107	-3.83168	-3.48511
Hallerella porci	0	-3.51828	-3.49865
Roseburia inulinivorans	-3.46663	-3.70548	-3.52666
Butyricimonas paravirosa	-4.1563	-3.53747	-3.52865
Eggerthella timonensis	0	-3.60331	-3.53966
Sporobacter termitidis	-3.28007	-3.1772	-3.55002
Lactobacillus gallinarum	0	-4.04676	-3.56624
Robinsoniella peoriensis	-3.75782	-3.84261	-3.5704
Velocimicrobium porci	-4.03827	-3.90625	-3.57303
Angelakisella massiliensis	-3.77331	-3.78894	-3.57525
Faecalibacillus faecis	-3.75551	-4.40337	-3.57602
Massiliimalia timonensis	-3.50826	-3.56412	-3.58983
Catenibacterium mitsuokai	-3.41662	-3.7032	-3.60123
Holdemanella biformis	-3.12741	-2.58803	-3.6512
[Ruminococcus] torques	-4.23047	-3.56759	-3.65162
Pseudoflavonifractor gallinarum	0	0	-3.65453
Limosilactobacillus reuteri	0	-3.05424	-3.66555
Anaerovibrio slackiae	-3.41193	-3.41211	-3.66696
Mogibacterium kristiansenii	-3.37988	-3.68372	-3.6692
Anaerobacterium chartisolvens	0	-4.24629	-3.69045
Acetivibrio ethanolgignens	-3.63519	-3.62314	-3.70361
Anaerovorax odorimutans	0	-3.42596	-3.71134
Blautia intestinalis	-3.65229	-3.92359	-3.72504
Solobacterium moorei	-3.85518	-3.81701	-3.74742
Companilactobacillus halodurans	0	0	-3.76883
Treponema berlinense	-3.91537	-3.62361	-3.78236
Bifidobacterium reuteri	-4.14662	0	-3.81293
Baileyella intestinalis	-4.3252	-3.91752	-3.81656
Prevotella rara	-3.67318	-3.46168	-3.82942
Eisenbergiella massiliensis	-3.72083	-3.77283	-3.84961
Inconstantimicrobium porci	0	0	-3.85585
Paucidesulfovibrio gracilis	-3.89344	-3.80497	-3.86021
Prevotellamassilia timonensis	-4.15849	0	-3.86225
Blautia faecis	-3.47548	-3.4662	-3.8629
Ruminococcus callidus	-3.58089	-3.56894	-3.87321
Ellagibacter isourolithinifaciens	-3.73734	-3.75609	-3.87559
Limosilactobacillus alvi	-4.05878	-4.12081	-3.91133
Williamwhitmania taraxaci	0	-4.53462	-3.92221
Alcanivorax profundi	-4.07502	-4.04519	-3.92896
Mordavella massiliensis	0	-3.93067	-3.94378
Clostridium fessum	-3.72183	-3.89724	-3.95904
Acetitomaculum ruminis	0	0	-3.96052
Murimonas intestini	-4.23112	-4.24376	-3.96289
Blautia glucerasea	-3.91824	-3.72124	-3.97593
Prevotella saccharolytica	0	-3.74715	-3.99435
Lactobacillus xujianguonis	-3.88105	-3.45474	-3.99875
Lachnospira pectinoschiza	0	0	-4.00548
Eubacterium ruminantium	0	-4.33647	-4.02954
Hallella seregens	0	-4.22775	-4.0446
Absicoccus porci	-4.03236	0	-4.07987
Terrisporobacter mayombei	-3.71887	0	-4.08391
Schleiferilactobacillus perolens	-4.15233	0	-4.09655
Thalassococcus profundi	-4.46928	-3.80696	-4.10637
Duncaniella muris	0	0	-4.10741
Paramuribaculum intestinale	-4.48833	-4.36967	-4.12859
Elizabethkingia argenteiflava	-4.16532	-4.1441	-4.15948
Eubacterium ramulus	-4.05102	-3.81365	-4.17646
[Ruminococcus] lactaris	-3.75768	0	-4.17955
Bilifractor porci	-3.80081	-4.15197	-4.18316
Lentilactobacillus buchneri	0	0	-4.19671
Fournierella massiliensis	-3.84871	-4.26301	-4.20929
Granulicatella balaenopterae	0	0	-4.21333
Allisonella histaminiformans	-3.49812	0	-4.23728
Eubacterium xylanophilum	0	0	-4.23747
Anaerostipes butyraticus	0	0	-4.24843
Streptococcus plurextorum	-4.15958	0	-4.25791
Enorma burkinafasonensis	-4.11549	0	-4.26921
Agathobacter ruminis	0	-3.49718	-4.32506
Alistipes shahii	-3.95605	-3.77712	-4.36024
Selenomonas ruminantium	0	0	-4.38652
Ruminococcus gauvreauii	-4.03141	0	-4.40151
Butyrivibrio crossotus	0	-3.53526	-4.41929
Bullifex porci	0	-4.47417	-4.43225
Collinsella bouchesdurhonensis	0	-4.17568	-4.43371
Heminiphilus faecis	0	0	-4.45382
Blautia stercoris	0	-4.36425	-4.45628
Lactobacillus equicursoris	-4.42233	0	-4.47944
Hungatella hathewayi	0	-3.98426	-4.48932
Prevotella loescheii	0	0	-4.49401
Clostridium sardiniense	0	-4.7693	-4.54395
Desulfovibrio piger	0	-4.5383	-4.5544
Alishewanella longhuensis	-4.50826	-4.4501	-4.60297
Blautia caecimuris	0	0	-4.68076
Lentilactobacillus parakefiri	0	0	-4.72004
Puniceibacterium confluentis	0	-4.77785	-4.74273
Slackia equolifaciens	0	0	-4.82611
Prevotella lascolaii	-4.77897	0	-4.84159
Treponema zioleckii	0	0	-4.87027
Coprococcus catus	-4.84276	-4.90058	-4.91585
Drancourtella massiliensis	0	-4.65092	-5.10872
Bittarella massiliensis	-2.02372	0	0
Bacteroides pyogenes	-2.22874	0	0
Negativibacillus massiliensis	0	-2.96799	0
Provencibacterium massiliense	0	-3.2178	0
Lactobacillus gigeriorum	0	-3.23589	0
Streptococcus alactolyticus	0	-3.28799	0
Floccifex porci	-3.37388	0	0
Holdemania massiliensis	0	-3.41641	0
Furfurilactobacillus rossiae	-3.42908	0	0
Bacteroides koreensis	0	-3.49672	0
Intestinimonas massiliensis	0	-3.50028	0
Bacteroides finegoldii	0	-3.6058	0
Hydrogenoanaerobacterium saccharovorans	0	-3.6487	0
Ruminococcus flavefaciens	0	-3.65261	0
Butyrivibrio fibrisolvens	0	-3.67398	0
Slackia isoflavoniconvertens	0	-3.67629	0
Prevotella albensis	0	-3.71044	0
Ligilactobacillus agilis	0	-3.77698	0
Prevotella nanceiensis	0	-3.80194	0
Butyricimonas synergistica	0	-3.89454	0
Streptomyces djakartensis	0	-3.90067	0
Lactobacillus kitasatonis	0	-3.905	0
Clostridium saudiense	0	-3.94069	0
Faecalitalea cylindroides	0	-4.00281	0
Gallibacter intestinalis	0	-4.01204	0
Megasphaera hominis	-4.0384	0	0
Limosilactobacillus panis	0	-4.03978	0
Cutibacterium porci	-4.05431	0	0
Selenomonas bovis	0	-4.05561	0
Prevotella illustrans	0	-4.06683	0
Megasphaera hexanoica	0	-4.12169	0
Bacteroides eggerthii	-4.14168	0	0
Tyzzerella nexilis	0	-4.15441	0
Intestinibacter bartlettii	0	-4.24201	0
Limosilactobacillus urinaemulieris	-4.28788	0	0
Lentilactobacillus farraginis	0	-4.35412	0
Parasutterella excrementihominis	0	-4.45292	0
Lamprocystis purpurea	-4.45607	0	0
Nonomuraea glycinis	-4.46152	0	0
Fibrobacter intestinalis	0	-4.48452	0
Paraburkholderia diazotrophica	-4.50704	0	0
Lentilactobacillus otakiensis	0	-4.56853	0
Lacticaseibacillus hegangensis	0	-4.571	0
Lachnobacterium bovis	0	-4.57182	0
Liquorilactobacillus uvarum	0	-4.57806	0
Anaerotignum lactatifermentans	0	-4.59911	0
Chryseobacterium oncorhynchi	-4.68191	0	0
Lentilactobacillus diolivorans	0	-4.78589	0
Komagataeibacter oboediens	0	-4.94899	0
Lactobacillus nasalidis	0	-4.9892	0
Deinococcus xianganensis	0	-5.12953	0
Alteribacter natronophilus	0	-5.14938	0
Streptomyces galbus	-5.17012	0	0
Bacteroides caecigallinarum	-5.172	0	0
Lactiplantibacillus plantarum	-3.74603	-2.52387	0
Levilactobacillus yonginensis	-3.49441	-2.83902	0
Oscillibacter ruminantium	-3.33097	-3.09011	0
Prevotella marshii	-3.32401	-3.51956	0
Clostridium aminobutyricum	-3.72524	-3.74119	0
Lactiplantibacillus pingfangensis	-3.87408	-3.62002	0
Clostridium polynesiense	-3.46336	-4.44236	0
Anaerostipes hominis	-4.09439	-3.94186	0
Sharpea porci	-4.42536	-3.63702	0
Prevotella buccalis	-4.23306	-4.023	0
Clostridium sartagoforme	-4.42976	-3.97527	0
Lachnospira multipara	-4.40624	-4.3967	0

## Sheet: G4_eight
species_name	G4_eight_rep1	G4_eight_rep2	G4_eight_rep3
Lactobacillus amylovorus	0.861867	0.504056	1.14841
Megasphaera elsdenii	0.300385	0.297379	0.700191
Prevotella copri	0.113819	0.0888177	0.457771
Porphyromonadaceae bacterium	-0.204573	-0.21394	0.159675
Klebsiella quasipneumoniae	-0.860622	-0.889818	-0.616388
Blautia obeum	-1.64592	-1.23796	-1.09469
Eubacterium pyruvativorans	-1.54342	-1.5826	-1.16891
Phocea massiliensis	-1.67918	-1.66657	-1.29349
Prevotella hominis	-1.65916	-1.67172	-1.3098
Dorea formicigenerans	-1.56804	-1.69242	-1.46127
Dorea longicatena	-1.82065	-1.84618	-1.4874
Bacteroides acidifaciens	-1.82732	-1.88457	-1.551
Treponema porcinum	-1.91785	-1.92167	-1.55773
Blautia massiliensis	-1.77223	-1.83543	-1.56414
Bacteroides kribbi	-2.02611	-2.17614	-1.61786
Mediterraneibacter faecis	-1.95452	-2.03527	-1.62867
Fusicatenibacter saccharivorans	-2.11229	-2.12998	-1.62894
Prevotella pectinovora	-2.05179	-2.05934	-1.69505
Oliverpabstia intestinalis	-2.12267	-2.13342	-1.79475
Clostridium celatum	-2.12647	-2.07992	-1.80297
Prevotella mizrahii	-2.06754	-2.09485	-1.80932
Mitsuokella jalaludinii	-2.18372	-2.42162	-1.82615
Hornefia butyriciproducens	-2.32039	-2.15049	-1.8272
Mediterraneibacter catenae	-2.59587	-2.35037	-1.85846
Prevotella stercorea	-2.24537	-2.24436	-1.89135
Phascolarctobacterium succinatutens	-2.28763	-2.30076	-1.91218
Bacteroides mediterraneensis	-2.25098	-2.33877	-1.95054
Butyricicoccus faecihominis	-2.2622	-2.43451	-1.96964
Bulleidia extructa	-2.35061	-2.28326	-1.99216
Roseburia faecis	-2.45885	-2.40834	-2.02226
Gemmiger formicilis	-2.46219	-3.40407	-2.12337
Phocaeicola massiliensis	-2.40581	-2.57706	-2.1386
Bariatricus massiliensis	0	-2.5595	0
Butyricicoccus porcorum	-2.40637	-2.56648	-2.0122
Levilactobacillus yonginensis	-2.83497	-2.72072	0
Bifidobacterium boum	-2.72605	-2.72619	0
Bacteroides finegoldii	0	-2.88193	0
Clostridium vitabionis	-2.50832	-2.3081	-2.14543
Faecalicoccus acidiformans	-2.65308	-2.71929	-2.17437
Lactiplantibacillus plantarum	-2.6061	-2.71186	-2.17563
Bacteroides zhangwenhongi	-2.58395	-2.57732	-2.2093
Lactobacillus kitasatonis	0	-2.43947	-2.22314
Alloprevotella rava	-2.79824	-2.73463	-2.32504
Blautia wexlerae	-2.53128	-2.72158	-2.35416
Megamonas rupellensis	-2.90901	-3.14411	-2.3634
Eisenbergiella porci	-2.80672	-2.5472	-2.3646
Prevotella brunnea	0	0	-2.37059
Blautia luti	-2.61586	-2.80445	-2.37179
Clostridium indicum	-2.73646	-2.88444	-2.37293
Mediterranea massiliensis	-2.70121	-2.85936	-2.3762
Blautia producta	-2.79909	-2.85401	-2.44929
Clostridium porci	-2.95561	-3.24677	-2.46315
Oribacterium asaccharolyticum	-2.8664	-3.0589	-2.4693
Agathobaculum butyriciproducens	-3.37725	-2.67483	-2.50366
Oscillibacter ruminantium	-2.86757	-3.11525	-2.5266
Terrisporobacter othiniensis	-2.87314	-2.92757	-2.54044
Faecalibacterium longum	-3.20745	-3.47817	-2.5406
Prevotella colorans	-3.33315	-3.36856	-2.55547
Holdemanella porci	-2.88206	-2.9677	-2.56889
Roseburia porci	-2.94156	-3.24743	-2.57771
Prevotella salivae	-2.90858	-2.89775	-2.5983
Anaerobutyricum soehngenii	-2.55115	-2.44514	-2.60344
Bacteroides fluxus	-3.08084	-2.90324	-2.60743
Bacteroides gallinarum	0	-2.99342	-2.64466
Sporobacter termitidis	-3.32525	-2.91842	-2.65043
Prevotella oralis	-3.46781	-3.16035	-2.66525
Hespellia stercorisuis	-3.22254	-2.96348	-2.71424
Frisingicoccus caecimuris	-3.02147	-2.71635	-2.73949
Clostridium cuniculi	-2.99935	-2.75405	-2.75397
Levilactobacillus paucivorans	-3.28162	-3.40302	-2.78319
Agathobaculum desmolans	-3.93574	0	-2.83639
Sinanaerobacter chloroacetimidivorans	-2.82149	-3.0597	-2.85182
Paraprevotella clara	-3.646	-3.42659	-2.8851
Terrisporobacter glycolicus	0	0	-2.89143
Ruminococcus bromii	-3.50308	-3.41432	-2.90254
Pediococcus parvulus	-3.35795	-3.45613	-2.91974
Prevotella marshii	-3.14664	0	-2.92441
Clostridium disporicum	-3.04577	-2.97686	-2.95367
Angelakisella massiliensis	-3.50334	-3.70527	-2.95897
Caproiciproducens galactitolivorans	0	0	-2.98115
Anaerovibrio slackiae	-3.46914	-3.42267	-3.0014
Metaprevotella massiliensis	-3.35008	-3.26498	-3.00864
Waltera intestinalis	-3.59695	-3.51927	-3.02057
Merdimonas faecis	-3.12252	-3.22473	-3.04725
Faecalicatena faecalis	-2.85302	-3.73204	-3.05209
[Ruminococcus] torques	-3.30653	-3.56264	-3.05698
Blautia intestinalis	-3.56932	-3.38934	-3.06629
Eggerthella timonensis	0	-3.72973	-3.07167
Selenomonas montiformis	-2.62564	-3.45655	-3.07372
Ruthenibacterium lactatiformans	0	0	-3.12885
Prevotella illustrans	-3.39238	-3.30244	-3.13815
Blautia glucerasea	-3.74949	-3.72578	-3.1393
Eubacterium coprostanoligenes	-2.86246	-3.26491	-3.14223
Eisenbergiella massiliensis	-3.88593	-3.47502	-3.14556
Pseudoflavonifractor gallinarum	0	0	-3.14569
Lactobacillus xujianguonis	-3.71136	-3.47754	-3.16225
Prevotella rara	-3.61956	-4.04417	-3.16328
Acetivibrio ethanolgignens	-3.44572	-3.50893	-3.17945
Massiliimalia timonensis	0	0	-3.19063
Lactobacillus porci	-3.57173	-4.08206	-3.19547
Granulicatella balaenopterae	-3.81614	-3.6311	-3.24462
Hallerella porci	-3.33005	0	-3.26469
Catenibacterium mitsuokai	-3.47381	-3.69056	-3.27632
Gemmiger gallinarum	0	-3.66236	-3.28938
Anaerostipes faecalis	-3.79659	-3.6912	-3.29109
Paucidesulfovibrio gracilis	-3.94728	-3.88531	-3.29288
[Ruminococcus] lactaris	-3.83331	-4.1308	-3.29702
Clostridium aminobutyricum	-4.41203	-4.07708	-3.30272
Faecalibacillus faecis	-3.60205	-4.31291	-3.30842
Streptomyces djakartensis	-3.77922	0	-3.32378
Prevotella albensis	0	-3.74154	-3.32733
Tyzzerella nexilis	0	0	-3.33261
Roseburia inulinivorans	-3.57905	-3.64613	-3.36829
Anaerobacterium chartisolvens	-3.64376	-3.94254	-3.36915
Anaerostipes hominis	-3.89626	-4.24333	-3.37463
Alistipes shahii	-3.57611	-3.76544	-3.37722
Duncaniella muris	-3.90308	-4.09254	-3.38141
Robinsoniella peoriensis	-3.38863	-3.4197	-3.38493
Bifidobacterium reuteri	0	-3.79006	-3.38891
Bacteroides gallinaceum	0	0	-3.39482
Lactiplantibacillus daowaiensis	-4.10606	0	-3.39674
Agathobacter ruminis	-4.31194	-3.67749	-3.41888
Butyricimonas synergistica	0	0	-3.42027
Ruminococcus callidus	-3.9208	-3.7304	-3.42295
Anaerovorax odorimutans	0	-3.93893	-3.43101
Ruminococcus gauvreauii	0	0	-3.46455
Clostridium saudiense	-3.76378	0	-3.47809
Allisonella histaminiformans	-4.28714	-4.07281	-3.4828
Lactiplantibacillus pingfangensis	0	-4.16743	-3.49186
Mogibacterium kristiansenii	-3.8525	-3.72157	-3.50523
Treponema berlinense	-3.95813	-3.71206	-3.50728
Collinsella bouchesdurhonensis	-4.24867	-3.91174	-3.54303
Terrisporobacter mayombei	-3.5152	0	-3.5521
Velocimicrobium porci	-3.66973	-3.7994	-3.57957
Ellagibacter isourolithinifaciens	-3.72949	-4.28814	-3.59
Eubacterium ventriosum	0	0	-3.59807
Alcanivorax profundi	-3.83315	-3.86363	-3.614
Bilifractor porci	-3.96875	-3.77055	-3.61579
Clostridium fessum	-4.31524	-3.72048	-3.62151
Blautia faecis	-3.8015	-3.71607	-3.62605
Solobacterium moorei	-3.83854	-4.09823	-3.64812
Butyrivibrio crossotus	-3.77428	-3.82392	-3.66162
Selenomonas ruminantium	0	-4.27955	-3.66973
Hallella seregens	-4.28807	-4.08223	-3.67604
Blautia schinkii	-4.15526	-3.11264	-3.69343
Floccifex porci	-4.08532	0	-3.71227
Limosilactobacillus alvi	0	0	-3.71762
Elizabethkingia argenteiflava	-3.86152	-3.80078	-3.73044
Faecalitalea cylindroides	0	0	-3.73806
Drancourtella massiliensis	-4.49557	-4.51862	-3.74103
Intestinibacter bartlettii	0	0	-3.74288
Leuconostoc kimchii	0	0	-3.76158
Eubacterium ramulus	-3.67527	-3.65793	-3.76806
Prevotella dentasini	0	0	-3.76909
Anaerostipes butyraticus	0	-4.04143	-3.78497
Baileyella intestinalis	-4.09334	-4.22746	-3.80736
Enterocloster asparagiformis	0	0	-3.81503
Mordavella massiliensis	0	-3.67769	-3.82473
Clostridium sartagoforme	-4.39565	0	-3.83739
Lacrimispora algidixylanolytica	0	0	-3.83996
Thalassococcus profundi	-3.83793	-4.05644	-3.84041
Butyrivibrio fibrisolvens	-4.20576	-3.97773	-3.85719
Eubacterium ruminantium	-3.79146	0	-3.86012
Lactobacillus gallinarum	-3.96964	-3.81779	-3.8844
Lentilactobacillus parakefiri	0	0	-3.9246
Ruminiclostridium hungatei	-4.27286	0	-3.99791
Paramuribaculum intestinale	0	-3.69269	-4.03356
Limosilactobacillus panis	0	-4.32707	-4.06366
Mailhella massiliensis	-4.30605	0	-4.07118
Fournierella massiliensis	-4.15783	-3.97891	-4.07484
Eubacterium xylanophilum	-4.37398	0	-4.09328
Sharpea porci	-4.3656	-3.21265	-4.10053
Bacteroides togonis	0	0	-4.10199
Megasphaera hexanoica	-4.37106	0	-4.10395
Alishewanella longhuensis	0	0	-4.12473
Olsenella porci	0	0	-4.1306
Slackia isoflavoniconvertens	-4.37171	-4.10739	-4.14296
Lentilactobacillus farraginis	-3.95963	-4.03225	-4.14583
Anaerobiospirillum succiniciproducens	0	0	-4.14836
Liquorilactobacillus uvarum	0	-3.9484	-4.15752
Williamwhitmania taraxaci	-3.97338	-4.494	-4.16087
Blautia stercoris	-3.88424	-3.75399	-4.17106
Prevotella corporis	0	0	-4.17954
Agrilactobacillus composti	0	0	-4.20192
Bacteroides caecigallinarum	0	0	-4.22747
Anaerotignum lactatifermentans	0	0	-4.22769
Pontibacillus litoralis	-4.50779	0	-4.23559
Bacteroides rodentium	0	-4.51026	-4.24364
Lactiplantibacillus plajomi	0	0	-4.25694
Streptomyces tendae	-4.38719	-4.48167	-4.37191
Alteribacter natronophilus	0	0	-4.38986
Puniceibacterium confluentis	0	0	-4.4001
Prevotella conceptionensis	0	0	-4.41659
Pseudoflavonifractor phocaeensis	-4.30135	-4.07584	-4.43303
Streptomyces longisporoflavus	-4.53473	0	-4.5184
Butyricimonas paravirosa	-3.4353	0	0
Companilactobacillus halodurans	-3.6115	0	0
Faecalicatena fissicatena	-3.68011	0	0
Treponema bryantii	-3.82222	0	0
Lachnospira multipara	-3.96202	0	0
Murimonas intestini	-4.07785	0	0
[Clostridium] dakarense	-4.10117	0	0
Enorma burkinafasonensis	-4.11189	0	0
Limosilactobacillus reuteri	-4.18855	0	0
Stecheria intestinalis	-4.30383	0	0
Absicoccus porci	-4.30439	0	0
Bacteroides koreensis	-4.31025	0	0
Lentilactobacillus sunkii	-4.45688	0	0
Leuconostoc holzapfelii	-4.48578	0	0
Trichococcus flocculiformis	-4.50163	0	0
Coprococcus catus	-4.80398	0	0
Vibrio ouci	-4.95292	0	0
Pyxidicoccus caerfyrddinensis	-4.99295	0	0
Holdemania massiliensis	0	-3.27992	0
Massiliimalia massiliensis	0	-3.31768	0
Selenomonas bovis	-4.39497	-3.44154	0
Holdemanella biformis	-3.78799	-3.56007	0
Bacteroides eggerthii	-3.45504	-3.5863	0
Sellimonas caecigallum	0	-3.63151	0
Prevotellamassilia timonensis	-3.76965	-3.74572	0
Acetatifactor muris	0	-3.90308	0
Paraeggerthella hongkongensis	0	-3.93403	0
Acetitomaculum ruminis	-4.37495	-3.94668	0
Streptococcus plurextorum	-4.35116	-4.04864	0
Evtepia gabavorous	-3.50708	-4.06728	0
Loigolactobacillus iwatensis	0	-4.08609	0
Hungatella hathewayi	-4.21525	-4.10083	0
Streptomyces viridodiastaticus	0	-4.11286	0
Streptococcus alactolyticus	0	-4.119	0
Lacrimispora amygdalina	-4.11528	-4.15679	0
Bullifex porci	-4.40814	-4.18169	0
Butyricicoccus pullicaecorum	0	-4.30196	0
Prevotella baroniae	-4.07213	-4.33927	0
Desulfovibrio piger	0	-4.38242	0
Levilactobacillus parabrevis	0	-4.46928	0
Sutterella seckii	0	-4.69426	0
Alistipes ihumii	0	-4.79633	0
Komagataeibacter oboediens	0	-4.85358	0
Myxococcus llanfairpwllgwyngyllgogerychwyrndrobwllllantysiliogogogochensis	0	-4.89715	0
Marinifilum breve	0	-4.90154	0
Saccharospirillum alexandrii	0	-5.00848	0
Caldisalinibacter kiritimatiensis	0	-5.07379	0
Streptomyces galbus	0	-5.13342	0

## Sheet: P1_four
species_name	P1_four_rep1	P1_four_rep2	P1_four_rep3
Lactobacillus amylovorus	0.779615	0.845482	0.800398
Porphyromonadaceae bacterium	0.625619	0.621453	0.675951
Streptococcus alactolyticus	0.195448	0.26434	0.366008
Limosilactobacillus reuteri	0.214385	0.224623	0.330595
Megasphaera elsdenii	0.144522	0.102281	0.106781
Ligilactobacillus ruminis	0.0134662	0.0322822	0.0578366
Bifidobacterium pseudolongum	-0.115421	-0.105487	-0.00723175
Lactobacillus johnsonii	0.16391	-0.229057	-0.174578
Klebsiella quasipneumoniae	-0.388868	-0.364876	0.104856
Prevotella copri	-0.577339	-0.533465	-0.442811
Bacteroidales bacterium	-0.587905	-0.581857	-0.509736
Streptococcus vicugnae	-1.24372	-1.22822	-1.16118
Eubacterium pyruvativorans	-1.26619	-1.30952	-1.22782
Blautia obeum	-1.40076	-1.23501	-1.18289
Mediterraneibacter catenae	-1.43158	-1.46098	-1.41987
Streptococcus gallolyticus	0	-1.4197	0
Phascolarctobacterium succinatutens	-1.69875	-1.68597	-1.6381
Enterococcus faecalis	-1.52749	-1.74872	-1.32693
Bariatricus massiliensis	-1.75932	-1.72731	-1.62805
Desulfovibrio piger	-1.92499	-1.84333	-1.76707
Phocea massiliensis	-1.8625	-1.84741	-1.82604
Lactobacillus gasseri	-1.8295	-1.97212	-2.17921
Oliverpabstia intestinalis	-2.13978	-2.11699	-2.00561
Treponema porcinum	-2.14683	-2.11272	-2.13003
Fusicatenibacter saccharivorans	-2.12733	-2.11904	-2.14792
Bulleidia extructa	-2.21132	-2.17728	-2.03062
Dorea formicigenerans	-2.34872	-2.05115	-2.02411
Clostridium vitabionis	-2.06035	-2.21178	-2.29882
Prevotella pectinovora	-2.3508	-2.30876	-2.23827
Lentilactobacillus farraginis	-2.48065	-2.30595	-2.17571
Faecalicoccus acidiformans	-2.42509	-2.35399	-2.27967
Aureimonas psammosilenae	-2.48987	-2.37131	-2.28707
Dorea longicatena	-2.40676	-2.39713	-2.40484
Clostridium indicum	-2.48465	-2.48669	-2.38035
Lactobacillus xujianguonis	-2.48462	-2.40088	-2.46668
Prevotella hominis	-2.52129	-2.47229	-2.3594
Roseburia porci	-2.47167	-2.44492	-2.47013
Faecalicatena faecalis	-2.55112	-2.46704	-2.40435
Gemmiger formicilis	-2.61853	-2.34329	-2.55556
Streptococcus equinus	-2.74238	-2.53445	-2.33973
Anaerobutyricum soehngenii	-2.7714	-2.36868	-2.48836
Bacteroides pyogenes	-2.52086	-2.58134	-2.54776
Prevotella mizrahii	-2.48695	-2.59379	-2.57437
Oscillibacter ruminantium	-2.48791	-2.61374	-2.60101
Sporobacter termitidis	-2.54804	-2.59731	-2.64534
Sinanaerobacter chloroacetimidivorans	-2.68462	-2.68712	-2.44031
Bacteroides gallinarum	-2.67259	-2.63218	-2.51772
Selenomonas montiformis	-3.01892	-2.47868	-2.33606
Bifidobacterium boum	-2.53109	-2.61696	-2.70606
Clostridium jeddahense	-2.68283	-2.72359	-2.55131
Mediterraneibacter faecis	-2.79518	-2.67502	-2.4907
Ruminococcus flavefaciens	-2.69061	-2.70229	-2.64077
Clostridium porci	-2.62286	-2.60053	-2.85996
Lactobacillus kitasatonis	-1.67786	-3.49289	-3.13732
Ellagibacter isourolithinifaciens	-2.83737	-2.75887	-2.71451
Oribacterium asaccharolyticum	-2.74003	-2.8736	-2.73189
Streptococcus macedonicus	0	-2.3292	0
Bacteroides ndongoniae	0	0	-2.33757
Pediococcus parvulus	0	0	-2.34975
Streptococcus henryi	0	-2.47891	0
Levilactobacillus fuyuanensis	-2.51844	0	0
Anaerostipes faecalis	0	0	-2.73705
Streptococcus acidominimus	-2.75026	0	0
Lactobacillus pasteurii	0	-2.9585	0
Bacteroides acidifaciens	-2.45419	0	-2.10133
Catenibacillus scindens	-2.53518	0	-2.47389
Intestinimonas massiliensis	-2.93279	-2.78206	0

## Sheet: P1_eight
species_name	P1_eight_rep1	P1_eight_rep2	P1_eight_rep3
Lactobacillus amylovorus	0.881689	0.728263	0.708285
Porphyromonadaceae bacterium	0.598169	0.540575	0.549486
Limosilactobacillus reuteri	0.252053	0.265734	0.245209
Streptococcus alactolyticus	0.282429	0.210186	0.198376
Ligilactobacillus ruminis	0.171247	0.108187	0.101835
Megasphaera elsdenii	0.0782099	0.0519451	0.0741019
Bifidobacterium pseudolongum	-0.0832292	-0.155215	-0.102343
Klebsiella quasipneumoniae	-0.0482779	-0.238844	-0.23499
Lactobacillus johnsonii	-0.225278	-0.131638	-0.337231
Streptococcus gallolyticus	0	-1.4665	0
Prevotella copri	-0.537127	-0.620039	-0.605396
Bacteroidales bacterium	-0.60261	-0.660932	-0.630234
Streptococcus macedonicus	0	-2.33309	0
Catenibacillus scindens	0	0	-2.52128
Anaerotruncus colihominis	-3.15548	0	0
Prevotella brunnea	0	0	-3.25287
Prevotella marseillensis	0	0	-3.36538
Clostridium amylolyticum	0	-3.39228	0
Chlamydia suis	0	0	-3.47504
Terrisporobacter glycolicus	0	-3.47875	0
Butyrivibrio crossotus	0	0	-3.49186
Acetanaerobacterium elongatum	0	0	-3.5188
Clostridium chromiireducens	-3.53365	0	0
Intestinimonas gabonensis	-3.57773	0	0
Blautia obeum	-1.1166	-1.20968	-1.28938
Enorma phocaeensis	-3.64089	0	0
Mediterraneibacter glycyrrhizinilyticus	0	0	-3.67025
Vescimonas coprocola	0	-3.67586	0
Hydrogeniiclostidium mannosilyticum	-3.68791	0	0
Streptococcus vicugnae	-1.17039	-1.29464	-1.23781
Inconstantimicrobium porci	0	-3.70428	0
Phocaeicola coprocola	0	0	-3.73778
Escherichia fergusonii	-3.77149	0	0
Enterocloster lavalensis	-3.80928	0	0
Acetobacteroides hydrogenigenes	-3.81023	0	0
Clostridium saudiense	-3.82025	0	0
Gordonibacter pamelaeae	0	0	-3.82526
Campylobacter jejuni	0	0	-3.82572
Paraeggerthella hongkongensis	0	0	-3.83642
Eubacterium pyruvativorans	-1.26659	-1.30703	-1.29413
Candidatus Stoquefichus massiliensis	-3.88248	0	0
Anaerosolibacter carboniphilus	-3.89001	0	0
Enorma burkinafasonensis	0	-3.90986	0
Collinsella provencensis	0	0	-3.9185
Anaerosporomusa subterranea	0	0	-3.9309
Enterocloster aldenensis	-3.95104	0	0
Rubneribacter badeniensis	-3.96629	0	0
Lachnospira multipara	0	-3.97664	0
Halomonas heilongjiangensis	0	0	-3.99575
Lachnospira pectinoschiza	-4.01597	0	0
Succinatimonas hippei	0	-4.03838	0
Kordiimonas sediminis	0	0	-4.05673
Clostridium sulfidigenes	0	0	-4.08576
Holdemanella biformis	0	0	-4.10235
Anaerovorax odorimutans	0	-4.12328	0
Prevotella nanceiensis	-4.17858	0	0
Xylanivirga thermophila	0	-4.1799	0
Acetivibrio mesophilus	0	-4.19291	0
Lapidilactobacillus concavus	0	0	-4.19478
Porcincola intestinalis	-4.19968	0	0
Oribacterium sinus	-4.22171	0	0
Clostridium punense	0	0	-4.23609
Clostridium fessum	0	-4.23712	0
Clostridium polynesiense	-4.24019	0	0
Bacteroides gallinaceum	0	0	-4.24424
Kiloniella litopenaei	0	0	-4.25581
Blautia faecis	0	-4.25961	0
Prevotella buccalis	0	0	-4.2796
Prevotella dentasini	-4.28629	0	0
Butyrivibrio fibrisolvens	0	-4.29	0
Butyricimonas paravirosa	0	-4.31477	0
Leuconostoc fallax	-4.32241	0	0
Lactobacillus equicursoris	-4.33726	0	0
Desulfosporosinus metallidurans	0	-4.35101	0
Arenibacter lacus	0	-4.36879	0
Lactobacillus hominis	-4.43452	0	0
Puniceibacterium confluentis	-4.44015	0	0
Slackia equolifaciens	-4.46223	0	0
Sellimonas caecigallum	0	0	-4.48085
Selenomonas ruminantium	0	0	-4.48217
Mediterraneibacter catenae	-1.45181	-1.50364	-1.52823
Anaerostipes hominis	0	-4.50496	0
Blautia caecimuris	-4.50687	0	0
Bacteroides rodentium	-4.51005	0	0
Prevotella baroniae	-4.52192	0	0
Desulforhopalus singaporensis	0	0	-4.53742
Alistipes ihumii	-4.55281	0	0
Victivallis vadensis	-4.55931	0	0
Clostridium sartagoforme	0	0	-4.58112
Eubacterium ramulus	-2.31481	-2.27002	0
Prevotella ihumii	0	0	-4.65879
Enterococcus faecalis	-1.67566	-1.51333	-1.51293
Ligilactobacillus equi	0	-4.722	0
Pseudobutyrivibrio ruminis	-4.73466	0	0
Alishewanella longhuensis	0	-4.81104	0
Bacteroides ndongoniae	0	-2.47226	-2.46751
Ruegeria haliotis	-4.9601	0	0
Coprococcus catus	-5.03169	0	0
Clostridium senegalense	-5.04883	0	0
Bifidobacterium boum	0	-2.59381	-2.4946
Paenibacillus azotifigens	-5.17562	0	0
Phascolarctobacterium succinatutens	-1.70177	-1.74388	-1.74915
Flavivirga rizhaonensis	0	0	-5.21652
Streptomyces galbus	0	0	-5.3339
Phocea massiliensis	-1.54927	-1.90533	-1.89424
Desulfovibrio piger	-1.90511	-1.91986	-1.78419
Bariatricus massiliensis	-1.6924	-1.83455	-2.14566
Intestinimonas massiliensis	-2.72985	0	-3.10048
Lactobacillus kitasatonis	-3.17695	-2.82107	0
Prevotella marshii	-3.24525	0	-2.84879
Phocaeicola massiliensis	0	-3.19449	-3.04007
Limosilactobacillus alvi	-3.00243	0	-3.25588
Clostridium disporicum	-3.24432	-3.09643	0
Bacteroides finegoldii	-3.44594	0	-2.94206
Oliverpabstia intestinalis	-2.08299	-2.15031	-2.15823
Bacteroides acidifaciens	-2.04487	-2.21349	-2.22595
Coprococcus phoceensis	-3.21887	-3.28506	0
Bulleidia extructa	-2.12888	-2.22918	-2.20637
Treponema porcinum	-2.15871	-2.25286	-2.2245
Fusicatenibacter saccharivorans	-2.25138	-2.2597	-2.14835
Lactobacillus gasseri	-2.14771	-2.23094	-2.29717
Selenomonas bovis	-2.24307	-2.20084	-2.2512
Blautia massiliensis	-2.16581	-2.39077	-2.17824
Mogibacterium kristiansenii	-2.2093	-2.30277	-2.27905
Clostridium vitabionis	-2.21828	-2.2955	-2.29839
Hornefia butyriciproducens	0	-3.68278	-3.21258
Dorea formicigenerans	-2.14065	-2.60116	-2.1975
Faecalicoccus acidiformans	-2.24621	-2.35209	-2.4033
Lactobacillus gigeriorum	-3.58431	-3.45042	0
Gemmiger formicilis	-2.26441	-2.38047	-2.39049
Prevotella pectinovora	-2.31912	-2.37761	-2.37759
Faecalibacterium longum	-3.56954	0	-3.52437
Candidatus Soleaferrea massiliensis	-3.84253	0	-3.29833
Faecalicatena fissicatena	-3.49258	-3.68782	0
Desulfohalotomaculum alkaliphilum	-3.59964	0	-3.58968
Clostridium paraputrificum	-3.65559	-3.57534	0
Lentilactobacillus farraginis	-2.33579	-2.56891	-2.39322
Agathobaculum butyriciproducens	-3.49703	-3.85639	0
Aureimonas psammosilenae	-2.38639	-2.41872	-2.56436
Clostridium indicum	-2.48292	-2.50151	-2.42703
Prevotella hominis	-2.43481	-2.50016	-2.50177
Prevotella illustrans	-3.8088	0	-3.75584
Streptococcus equinus	-2.40684	-2.61008	-2.56028
Lactobacillus xujianguonis	-2.38561	-2.61582	-2.5842
Eggerthella sinensis	-3.56914	0	-4.0167
Stecheria intestinalis	-3.91227	0	-3.74708
Faecalicatena faecalis	-2.36008	-2.75153	-2.58447
Sharpea porci	-3.42329	-4.31226	0
Anaerostipes faecalis	-4.02865	-3.7181	0
Pediococcus parvulus	-2.91864	-2.38871	-2.45416
Geosporobacter subterraneus	-3.90238	0	-3.88143
Flavobacterium amnicola	-3.90859	-3.88159	0
Sporobacter termitidis	-2.58716	-2.55726	-2.74255
Sinanaerobacter chloroacetimidivorans	-2.7435	-2.53142	-2.65822
Roseburia porci	-2.52232	-2.60647	-2.80745
Butyricimonas synergistica	0	-3.8275	-4.1227
Gallibacter intestinalis	-3.90126	-4.08471	0
Bacteroides gallinarum	-2.61552	-2.72613	-2.66684
Hallerella porci	0	-3.94868	-4.0622
Faecalibacillus faecis	-3.94556	-4.07808	0
Desulfonispora thiosulfatigenes	0	-4.07756	-3.94769
Prevotella mizrahii	-2.72068	-2.63912	-2.68032
Oribacterium asaccharolyticum	-2.78817	-2.68511	-2.58601
Dorea longicatena	-2.56954	-2.63657	-2.86326
Oscillibacter ruminantium	-2.62382	-2.75491	-2.69269
Ruminococcus flavefaciens	-2.66592	-2.69427	-2.73374
Anaerobutyricum soehngenii	-2.67588	-2.86714	-2.62702
Granulicatella balaenopterae	-4.34803	-3.82774	0
Limosilactobacillus panis	-3.9795	-4.21068	0
Eubacterium oxidoreducens	0	-4.35081	-3.8596
Ellagibacter isourolithinifaciens	-2.8646	-2.6674	-2.69744
Nonomuraea glycinis	-4.09684	0	-4.14745
Agathobaculum desmolans	-2.73514	-2.79101	-2.72037
Limosilactobacillus fermentum	-2.55039	-2.62057	-3.14504
Prevotella stercorea	-2.53517	-2.95676	-2.89135
Trichococcus flocculiformis	0	-4.15714	-4.24945
Mediterraneibacter faecis	-2.80138	-2.75105	-2.86119
Pseudoruminococcus massiliensis	-2.92073	-2.6222	-2.88286
Bifidobacterium reuteri	-4.17096	-4.25559	0
Selenomonas montiformis	-2.56548	-2.92563	-2.94884
Dorea phocaeensis	-2.72732	-2.78073	-2.97035
Clostridium porci	-2.70456	-2.98868	-2.7967
Pseudoscardovia suis	-4.21926	0	-4.29251
Prevotella oralis	-2.67817	-2.81813	-3.02429
Sutterella parvirubra	0	-4.39334	-4.13865
Ruthenibacterium lactatiformans	-4.70952	-3.82313	0
Marseilla massiliensis	-4.25814	0	-4.31486
Eisenbergiella porci	-2.87613	-2.91642	-2.86811
Clostridium jeddahense	-3.00166	-2.94144	-2.72586
Christensenella intestinihominis	-2.95394	-2.92696	-2.80921
Clostridium cuniculi	-2.86545	-2.91294	-2.91915
Prevotella colorans	-2.87597	-3.01527	-2.82116
Blautia wexlerae	-2.93829	-2.72233	-3.11561
Pseudoflavonifractor gallinarum	0	-4.28116	-4.53623
[Lactobacillus] timonensis	-4.32241	0	-4.50794
Ruminococcus bromii	-2.93593	-2.92069	-2.97531
Clostridium minihomine	-2.57871	-3.19657	-3.06805
Streptococcus thermophilus	-2.81105	-3.08661	-2.96395
Bacteroides mediterraneensis	-2.90758	-2.89148	-3.0851
Drancourtella massiliensis	0	-4.48398	-4.41114
Hydrogenoanaerobacterium saccharovorans	-3.0981	-3.05977	-2.84847
Bifidobacterium apri	-4.52329	0	-4.50294
Levilactobacillus namurensis	-4.51757	0	-4.52214
Clostridium puniceum	-4.58924	0	-4.50878
Hespellia stercorisuis	-2.94227	-3.09666	-3.09161
Holdemania massiliensis	-3.16055	-2.82251	-3.22042
Pseudoflavonifractor phocaeensis	-3.14528	-3.16682	-2.95895
Parabacteroides acidifaciens	-4.66283	-4.63589	0
Clostridium celatum	-2.92247	-3.38045	-3.03313
Anaerobacterium chartisolvens	-3.05562	-3.12087	-3.187
Terrisporobacter othiniensis	-3.2423	-3.11805	-3.08544
Bacteroides zhangwenhongi	-2.84673	-3.72676	-2.87424
Blautia producta	-3.07945	-3.11123	-3.28896
Negativibacillus massiliensis	-3.3548	-2.96418	-3.22191
Bacillus cabrialesii	0	-4.53143	-5.01634
Lactobacillus porci	-3.3639	-2.97804	-3.29742
Butyricicoccus porcorum	-3.15016	-3.30399	-3.21242
Alteribacter natronophilus	-4.97614	-4.77424	0
Massiliimalia timonensis	-3.30439	-3.01582	-3.44559
Angelakisella massiliensis	-3.28254	-3.26208	-3.22378
Blautia luti	-3.30678	-3.1669	-3.30377
Merdimonas faecis	-3.1277	-3.32622	-3.42303
Lactobacillus gallinarum	-3.10829	-3.11337	-3.68313
Heminiphilus faecis	-3.75359	-3.0526	-3.10611
Chryseobacterium oncorhynchi	-5.07735	-4.84145	0
Holdemanella porci	-3.22505	-3.35271	-3.36578
Robinsoniella peoriensis	-3.28998	-3.3121	-3.36946
Sutterella seckii	-5.02207	-4.99626	0
Colwellia ponticola	-5.02554	-4.99974	0
Ruminococcus gauvreauii	-3.49602	-3.39343	-3.14884
Paramuribaculum intestinale	-3.40915	-3.12234	-3.53026
Bacteroides fluxus	-3.36075	-3.24238	-3.4944
Mediterranea massiliensis	-3.16004	-3.74932	-3.47876
Prevotella salivae	-3.73867	-3.31161	-3.34363
Clostridium aminobutyricum	-3.48683	-3.58791	-3.43144
Roseburia faecis	-3.64796	-3.42414	-3.44612
Paraprevotella clara	-3.39841	-3.67103	-3.51556
Blastopirellula cremea	-3.59077	-3.57354	-3.54154
Acetivibrio ethanolgignens	-3.40701	-3.70042	-3.61387
Metaprevotella massiliensis	-3.51768	-3.29821	-3.91506
Caproiciproducens galactitolivorans	-3.79494	-3.23063	-3.7114
Velocimicrobium porci	-3.25878	-3.44977	-4.08344
Eubacterium coprostanoligenes	-3.59837	-3.54262	-3.70564
Fibrobacter intestinalis	-3.29659	-3.84507	-3.72645
Waltera intestinalis	-3.55753	-3.63145	-3.71262
Bacteroides togonis	-3.5528	-3.66488	-3.6872
Treponema bryantii	-3.58393	-3.7646	-3.598
Evtepia gabavorous	-3.59183	-3.87141	-3.49416
Blautia intestinalis	-3.43278	-3.27129	-4.27061
Bacteroides kribbi	-4.08759	-4.00009	-2.92272
Mitsuokella jalaludinii	-3.97705	-3.92685	-3.17177
Catenibacterium mitsuokai	-3.72322	-3.71701	-3.69459
Anaerobutyricum hallii	-3.39667	-4.50329	-3.27002
Butyricicoccus faecihominis	-3.51928	-3.78241	-3.8995
Ructibacterium gallinarum	-3.67998	-3.90329	-3.63588
Fournierella massiliensis	-3.79995	-3.95197	-3.51461
Bacteroides eggerthii	-3.76844	-3.85461	-3.68866
[Ruminococcus] torques	-3.79834	-4.03299	-3.50156
Frisingicoccus caecimuris	-3.7041	-3.87382	-3.82254
Solobacterium moorei	-3.72108	-3.90693	-3.86867
Alloprevotella rava	-3.98202	-3.96821	-3.57603
Prevotella rara	-3.7191	-3.73666	-4.07972
Slackia isoflavoniconvertens	-4.41229	-3.60828	-3.74411
Blautia schinkii	-3.77539	-4.12032	-3.87396
Schinkia azotoformans	-3.81276	-4.31288	-3.6565
Anaerovibrio slackiae	-3.87577	-3.98855	-3.97043
Roseburia inulinivorans	-4.04854	-3.98405	-3.92935
Ruminiclostridium hungatei	-3.94578	-3.73597	-4.28341
Eisenbergiella massiliensis	-4.17193	-4.00527	-3.81042
Eubacterium ruminantium	-3.9438	-4.01401	-4.09527
Terrisporobacter mayombei	-4.13316	-3.83169	-4.0943
Ruminococcus callidus	-3.77542	-4.23965	-4.11644
Blautia glucerasea	-3.97096	-4.14401	-4.07312
Alistipes shahii	-3.82622	-4.19311	-4.23326
Floccifex porci	-4.11483	-4.12602	-4.02196
Williamwhitmania taraxaci	-4.02633	-4.05174	-4.18951
Corynebacterium striatum	-4.07962	-4.38564	-3.82404
Bullifex porci	-4.12941	-4.2167	-3.95286
[Ruminococcus] lactaris	-3.9551	-4.27975	-4.14617
Collinsella bouchesdurhonensis	-4.06234	-4.03753	-4.29859
Hallella seregens	-4.29936	-3.97212	-4.1408
Tyzzerella nexilis	-4.30724	-3.95491	-4.19302
Neobacillus bataviensis	-4.04185	-4.3475	-4.13757
Treponema berlinense	-4.14709	-4.37807	-4.04666
Megasphaera hexanoica	-4.29773	-4.23517	-4.07957
Alcanivorax profundi	-4.23237	-4.28373	-4.18006
Treponema zioleckii	-3.96145	-4.26464	-4.48827
Duncaniella muris	-4.17908	-4.31585	-4.22766
Parasutterella excrementihominis	-4.19702	-4.4831	-4.0615
Absicoccus porci	-4.26233	-4.01736	-4.50349
Elizabethkingia argenteiflava	-4.1316	-4.36306	-4.32572
Nesterenkonia natronophila	-4.17132	-4.41503	-4.32629
Prevotella albensis	-4.42655	-4.55521	-4.09918
Agathobacter ruminis	-4.19566	-4.5368	-4.36722
Baileyella intestinalis	-4.55339	-4.03143	-4.53325
Lacrimispora algidixylanolytica	-4.50582	-4.19495	-4.48112
Eubacterium xylanophilum	-4.58764	-4.56311	-4.30757
Thalassococcus profundi	-4.80737	-4.92099	-4.61732

[truncated: 6 more sheets: P2_four, P2_eight, P3_four, P3_eight, P4_four, P4_eight]
